1 **Phylogeny and distinct properties of major intrinsic proteins in the genomes of six**  
2 ***Phytophthora* species suggest their novel functions in *Phytophthora***

3  
4  
5 Abul Kalam Azad<sup>1,\*</sup>, Jahed Ahmed<sup>1,†</sup>, Al-Hakim<sup>1,†</sup>, Md. Mahbub Hasan<sup>2</sup>, Md. Asraful Alum<sup>3</sup>,  
6 Mahmudul Hasan<sup>1,†</sup>, Takahiro Ishikawa<sup>4</sup>, Yoshihiro Sawa<sup>4</sup>

7  
8 <sup>1</sup>*Department of Genetic Engineering and Biotechnology, Shahjalal University of Science and*  
9 *Technology, Sylhet 3114, Bangladesh*

10 <sup>2</sup>*Department of Genetic Engineering and Biotechnology, University of Chittagong, Chittagong-*  
11 *4331, Bangladesh*

12 <sup>3</sup>*Forensic DNA Laboratory of Bangladesh Police, Malibagh, Dhaka-1000, Bangladesh*

13 <sup>4</sup>*Department of Life Science and Biotechnology, Shimane University, Shimane 690-8504, Japan*

14  
15 †Present Addresses: JA, *Louvain Institute of Biomolecular Science and Technology, Université*  
16 *catholique de Louvain, Louvain-la-Neuve-1348, Belgium*; AH, *Centre for Vaccine Sciences,*  
17 *International Centre for Diarrhoeal Disease Research, Bangladesh*; MH, *Department of*  
18 *Pharmaceutical and Industrial Biotechnology, Sylhet Agricultural University, Sylhet,*  
19 *Bangladesh*

20  
21  
22 **\*Corresponding author:** Department of Genetic Engineering & Biotechnology, Shahjalal  
23 University of Science and Technology, Sylhet 3114, Bangladesh. Tel.: + 88 0821 717850x411;  
24 fax: + 88 0821 725050; E-mail: dakazad-btc@sust.edu

25  
26  
27  
28  
29  
30

31 **Highlights:**

32

33

- Major intrinsic proteins (MIPs) family in *Phytophthora* species are divergent.

34

- *Phytophthora* MIPs (PMIPs) were phylogenetically and structurally distinct from their counterparts in other taxonomic domains.

35

36

- PMIPs might have novel functions.

37

- The MIPs are suggested to be involved in host-pathogen interactions and could be considered attractive anti-*Phytophthora* targets.

38

39 **ABSTRACT**

40 Major intrinsic proteins (MIPs), commonly known as aquaporins, transport water and other non-

41 polar solutes across membranes. MIPs are believed to be involved in host-pathogen interactions.

42 Herein, we identified 17, 24, 27, 19, 19, and 22 full-length MIPs, respectively, in the genomes of

43 six *Phytophthora* species, *P. infestans*, *P. parasitica*, *P. sojae*, *P. ramorum*, *P. capsici*, and *P.*

44 *cinnamomi*, which are devastating plant pathogens and members of oomycetes, a distinct lineage

45 of fungus-like eukaryotic microbes. Phylogenetic analysis showed that the *Phytophthora* MIPs

46 (PMIPs) formed a completely distinct clade from their counterparts in other taxa and were

47 clustered into nine subgroups. Sequence and structural analysis of homology models indicated

48 that the primary selectivity-related constrictions, including aromatic arginine (ar/R) selectivity

49 filter and Froger's positions in PMIPs were distinct from those in other taxa. The substitutions in

50 the conserved Asn-Pro-Ala motifs in loops B and E of many PMIPs were also divergent from

51 those in plants. We further deciphered group-specific consensus sequences/motifs in different

52 loops and transmembrane helices of PMIPs, which were distinct from those in plants, animals,

53 and microbes. The data collectively supported the notion that PMIPs might have novel functions

54 and could be considered attractive anti-*Phytophthora* targets.

55 **Keywords:** Major intrinsic proteins, *Phytophthora*, Phylogeny, Oomycetes and Substrate

56 specificity

57 **1. Introduction**

58

59 The super family of major intrinsic proteins (MIPs) possesses channel-forming integral  
60 membrane proteins that transport water and other non-polar small solutes, such as ammonia,  
61 urea, boron, silicon, carbon dioxide, glycerol, hydrogen peroxide, antimony, and arsenite  
62 (Gomes et al., 2009; Ishibashi et al., 2009; Azad et al., 2012; Verkman, 2012; Maurel et al.,  
63 2015; Pommerrenig et al., 2015; Azad et al., 2016; Azad et al. 2018). They are found in all  
64 living organisms from bacteria to mammals and are abundant in plants (Gomes et al., 2009;  
65 Azad et al., 2011; Maurel et al., 2015). Orthodox aquaporins (AQPs), which transport only  
66 water and aquaglyceroporins (AQGPs), that can transport other uncharged small solutes in  
67 addition to water or without water, are prototype members of MIPs (Mukhopadhyay et al., 2014;  
68 Maurel et al., 2015; Pommerrenig et al., 2015).

69 All AQPs share some structural features, although their amino acid sequences differ  
70 substantially. Each monomer of MIP is composed of six transmembrane (TM)  $\alpha$ -helices (H1-  
71 H6) with five connecting loops (loops LA–LE) and cytoplasmic N- and C-termini. The pore of  
72 the channel is characterized by two constrictions that theoretically specify the profile of  
73 transport selectivity. The first constriction is formed at the center of the pore by two highly  
74 conserved Asn-Pro-Ala (NPA) motifs on loops B and E because of the close opposition of their  
75 asparagine residues (Wallace and Roberts, 2004). This constriction is involved in proton  
76 exclusion (Tajkhorshid et al., 2002). The second constriction, called the aromatic/arginine (ar/R)  
77 constriction or the selectivity filter, is formed toward the luminal side of the membrane by four  
78 residues from helix 2 (H2), helix 5 (H5), and loop E (LE1 and LE2) (Fu et al., 2000; Sui et al.,  
79 2001). Mutation at this ar/R selectivity filter is thought to determine the broad spectrum of  
80 substrate conductance in plant AQPs (Wallace and Roberts, 2004; Gupta and

81 Sankararamakrishnan, 2009; Azad et al., 2012; Azad et al., 2016). Five relatively conserved  
82 amino acid residues known as Froger's positions (FPs) and designed P1–P5 play roles in MIP  
83 sub-grouping and substrate selectivity (Froger et al., 1998; Heymann and Engel, 2000; Azad et  
84 al., 2016).

85 Although 13 different MIPs identified in mammals are divided into three major subfamilies,  
86 the genomes of plants encode 2–5-fold or more MIPs, which are grouped into 4–7 subfamilies  
87 (Maurel et al., 2015; Azad et al., 2016; Potokar et al., 2016). However, fungi genomes have up  
88 to five MIPs with diversified subgroups (Pettersson et al., 2005; Verma et al., 2014). Algae have  
89 1–6 MIPs, but are highly divergent and share only limited similarities with land plant MIPs  
90 (Anderberg et al., 2011). In humans, MIPs play significant roles in brain-water balance, kidney  
91 nephrons, cell migration, cell proliferation, neural activity, pain, epithelial fluid secretion, skin  
92 hydration, adipocyte metabolism, and ocular function (Ishibashi et al., 2009; Verkman, 2012).  
93 They are associated with many human diseases, such as glaucoma, cancer, epilepsy,  
94 nephrogenic diabetes insipidus, and obesity (Ishibashi et al., 2009; Verkman, 2012), and  
95 therefore, they have been potential drug targets (Soveral and Casini, 2017). In plants, MIPs are  
96 involved in many physiological processes, such as motor cell movement, root and leaf hydraulic  
97 conductance, diurnal regulation of leaf movements, rapid internode elongation, responses to  
98 numerous biotic and abiotic stresses, temperature-dependent petal movement, and petal  
99 development (Azad et al., 2004; Peng et al., 2007; Azad et al., 2008; Uehlein and Kaldenhoff,  
100 2008; Gomes et al., 2009; Gao et al., 2010; Muto et al., 2011; Azad et al., 2013; Maurel et al.,  
101 2015; Afzal et al., 2016; Sonah et al., 2017). MIPs also play important roles in host-parasite  
102 interactions and numerous MIPs have been reported in several protozoan parasites, such as  
103 *Plasmodium*, *Trypanosoma*, and *Leishmania* species (Hansen et al., 2002; Montalvetti et al.,  
104 2004; Beitz, 2005; Fadiel et al., 2009; Kun and de Carvalho, 2009; Baker et al., 2012). These

105 MIPs are considered potential drug targets (Beitz, 2005; Fadiel et al., 2009; Kun and de  
106 Carvalho, 2009). In mycorrhized plants, both plant and fungal MIPs play significant roles in  
107 water and nutrient transport and in the drought resistance of plants (Giovannetti et al., 2012; Li  
108 et al., 2013; Maurel et al., 2015). MIPs in pathogenic fungi may act as attractive targets for  
109 antifungal drugs (Verma et al., 2014). However, no study has been conducted on the MIPs of  
110 oomycetes, a distinct lineage of fungus-like eukaryotes with diverse microorganisms that are  
111 related to organisms such as brown algae and diatoms (Beakes et al., 2012; Thines, 2014; Fawke  
112 et al., 2015; Wang et al., 2016). Oomycetes are globally distributed and ubiquitous in marine,  
113 freshwater, and terrestrial environments (Thines, 2014), and cause devastating diseases to both  
114 plants and animals (Derevnina et al., 2016).

115 Among oomycetes, the *Phytophthora* genus comprises more than 117 species, which are highly  
116 devastating to a wide range of agriculturally and ornamentally important plants, causing severe  
117 economic losses (Martin et al., 2012; Kroon et al., 2004; Tyler et al., 2006; Beakes et al., 2012;  
118 Thines, 2014; Fawke et al., 2015; Wang et al., 2016). *P. infestans*, the cause of late blight of  
119 potato and tomato, resulted the Irish Potato Famine in the mid-19th century (Haas et al., 2009;  
120 Yoshida et al., 2013; Thines, 2014; Wang et al., 2016), and *P. sojae* costs the soybean industry  
121 millions of dollars each year (Tyler et al., 2006; Sahoo et al., 2017). *P. ramorum*, the cause of  
122 death of oak trees in North America, has severe impact on natural ecosystem, and *P. cinnamomi*  
123 is a substantial threat to natural eucalyptus forests in Australia (Tyler et al., 2006; Lamour et al.,  
124 2012; Thines, 2014). *P. capsici* causes foot rot disease in black pepper and *Phytophthora* blight  
125 in vegetable crops, which causes serious effects on the production of cucurbits, peppers,  
126 eggplants, and numerous other important vegetables worldwide (Jackson et al., 2012; Hao et al.,  
127 2016; Johnson et al., 2016; Liu et al., 2016). *P. parasitica* infects a broad range of plants, being  
128 capable of infecting over 72 plant genera worldwide (Blackman et al., 2015; Meng et al., 2015).

129 The genome sequences of these six plant pathogenic *Phytophthora* species have been completed  
130 (Tyler et al., 2006; Haas et al., 2009; Lamour et al., 2012; Fawke et al., 2015) and are available  
131 in 'FungiDB' (<http://fungidb.org/fungidb/>). In the study reported herein, we identified and  
132 characterized *MIP* genes in the genomes of these six *Phytophthora* species (*PinMIP*, *PpaMIP*,  
133 *PsoMIP*, *PraMIP*, *PcaMIP*, and *PciMIP* genes of *P. infestans*, *P. parasitica*, *P. sojae*, *P.*  
134 *ramorum*, *P. capsici*, and *P. cinnamomi*, respectively) by using bioinformatics tools. To the best  
135 of our knowledge, this is the first report on MIPs of any organism of oomycetes. This report  
136 showed that the genomes of *Phytophthora* species have several-fold greater number of MIP  
137 homologues than those of algae, fungi, other parasites, and even more than in mammals. The  
138 numbers of their MIP homologues are comparable to that of plants. Comprehensive analysis  
139 with different bioinformatics tools revealed that the MIPs in *Phytophthora* species are  
140 phylogenetically and structurally distinct from their counterparts in other taxa.

141

## 142 **2. Materials and methods**

143

### 144 *2.1. Identification of PinMIP, PpaMIP, PsoMIP, PrMIP, PcaMIP, and PciMIP genes*

145 The genomes of *P. infestans* T30-4, *P. parasitica* INRA-310, *P. sojae* strain P6497, *P. ramorum*  
146 strain Pr102, *P. capsici* LT1534, and *P. cinnamomi* CBS 144.22 are available at FungiDB  
147 (<http://fungidb.org/fungidb/>). In FungiDB, a search with the keyword 'aquaporin' revealed that  
148 21, 26, 35, 32, 25, and 32 aquaporin hits were available for each strain of *P. infestans*, *P.*  
149 *parasitica*, *P. sojae*, *P. ramorum*, *P. capsici*, and *P. cinnamomi*, respectively. We retrieved the  
150 protein sequences of these available AQPs for every organism and checked the typical features  
151 of AQPs in their primary protein structures. All of the AQP protein sequences available in every  
152 *Phytophthora* species were used as queries for MIPs in the genome of a particular *Phytophthora*

153 species using TBLASTN and BLASTp tools. Furthermore, the genomes of the *Phytophthora*  
154 species were searched for MIPs using TBLASTN and BLASTp tools with the protein sequences  
155 of the complete set of 55 MIPs from *Populus trichocarpa* (PtMIP), 22 MIPs from  
156 *Physcomitrella patens* (PpMIP), and 13 MIPs from humans (MAQPs) as queries so that XIPs  
157 (uncharacterized X intrinsic proteins), GIPs (GlpF-like intrinsic proteins), HIPs (Hybrid intrinsic  
158 proteins) or superaquaporins could be detected if they were encoded in the genomes of the six  
159 *Phytophthora* species. MIPs in *P. infestans* (PinMIPs), *P. parasitica* (PpaMIPs), *P. sojae*  
160 (PsoMIPs), *P. ramorum* (PraMIPs), *P. capsici* (PcaMIPs), and *P. cinnamomi* (PciMIPs) were  
161 included until no more MIPs could be found from the corresponding species. Every sequence  
162 from each *Phytophthora* species was individually compared to identify the maximum number of  
163 MIPs for further analyses. Some of the MIP sequences might have been partial or might not  
164 have had all the features associated with its MIP channel. To investigate this, we used the  
165 multiple alignment program Clustal Omega (<http://www.ebi.ac.uk/Tools/msa/clustalo/>) to align  
166 all the sequences in an individual species. The multiple sequence alignment was used to  
167 determine the following features specific to the MIP family: (i) presence of two NPA or NPA-  
168 like motifs, (ii) presence of six TM  $\alpha$ -helices, and (iii) two functionally important loops  
169 possessing the features characteristically present in MIP channels. The TM  $\alpha$ -helices were  
170 predicted by SOSUI (<http://bp.nuap.nagoya-u.ac.jp/sosui/>), TMpred  
171 ([http://www.ch.embnet.org/software/TMPRED\\_form.html](http://www.ch.embnet.org/software/TMPRED_form.html)), and the tools of ExPASy  
172 (<http://kr.expasy.org/tools/>). The genomic regions containing *MIP* genes were further used to  
173 determine the gene structure using the program GeneMark.hmm ES-3.0 (Lomsadze et al., 2005)  
174 (<http://exon.gatech.edu/GeneMark>), a self-training based algorithm for prediction of genes from  
175 novel eukaryotic genomes. When short genes were found, their sequences with 1000 base  
176 flanking regions were subjected to Genetyx\_SV\_RC\_version 7 to investigate their protein

177 sequences.

178

179

180 *2.2. Phylogenetic and domain analysis of PinMIPs, PpaMIPs, PsoMIPs, PrMIPs, PcaMIPs, and*

181 *PciMIPs*

182 To understand the diversity and evolution of PMIPs and to compare them with those in plants,

183 animals, fungi, and algae, we performed phylogenetic analysis of all MIPs in six *Phytophthora*

184 species using Molecular Evolution Genetic Analysis (MEGA) version 5.0 (Tamura et al. 2011).

185 PinMIPs, PpaMIPs, PsoMIPs, PrMIPs, PcaMIPs, and PciMIPs were aligned with all PtMIPs,

186 PpMIPs, and MAQPs, and five representative members from each of 10 subfamilies of MIPs in

187 fungi (Verma et al., 2014) and all MIPs in the genomes of nine algae (Anderberg et al., 2011)

188 using the Clustal Omega program (<http://www.ebi.ac.uk/Tools/msa/clustalo/>) and a

189 phylogenetic tree was constructed with MEGA. The evolutionary history was inferred using two

190 different clustering algorithms, namely neighbor-joining and maximum parsimony methods

191 which are generally used for phylogenetic analysis of MIPs (Abascal et al. 2014; Verma et al.

192 2014; Danielson and Johanson 2010), and the genetic distance was estimated by the p-distance

193 method. Reliability of individual branches of the tree was estimated by performing

194 bootstrapping with 1000 replicates. To construct the phylogenetic tree with the MIPs in the six

195 *Phytophthora* species, all of their MIPs were aligned as above. The identified PinMIPs,

196 PpaMIPs, PsoMIPs, PrMIPs, PcaMIPs, and PciMIPs were classified into different subfamilies

197 and groups based on the phylogenetic tree constructed from them.

198

199 *2.3. Prediction of subcellular localization and computation of Ka/Ks value*

200 The subcellular localizations of PMIPs were predicted *in silico* by using tools of WoLF PSORT

201 (<http://www.genscript.com/wolf-psort.html>) and Cello prediction system



202 (<http://cello.life.nctu.edu.tw/>) as described previously (Azad et al., 2016). The Ka/Ks values of  
203 the *PMIPs* were calculated using an online Ka/Ks calculation tool at  
204 <http://services.cbu.uib.no/tools/kaks>. A Ka/Ks value greater than one implied gene evolution  
205 under positive or Darwinian selection; less than one indicated purifying (stabilizing) selection,  
206 and a Ka/Ks value of one suggested a lack of selection or possibly a combination of positive and  
207 purifying selections at different points that canceled each other out (Zhang et al., 2013).

208

#### 209 *2.4. Homology modeling*

210 Homology models were constructed using the Molecular Operating Environment software  
211 (MOE 2009.10; Chemical Computing Group, Quebec, Canada), based on a segment-matching  
212 procedure (Levitt, 1992) and a best-intermediate algorithm with the option to refine each  
213 individual structure enabled. The sequence of each MIP homolog was aligned with the open  
214 conformation of spinach PIP, SoPIP2;1 (PDB, Protein Data Bank ID: 2B5F) (Törnroth-  
215 Horsefield et al., 2006), or other AQP templates as indicated, using the MOE software as  
216 previously described (Azad et al., 2012). The alignment of each MIP homolog was based on  
217 both sequence and structural homology with the structure of SoPIP2;1. The 3D structure models  
218 were formed using the MOE homology program and the stereochemical quality of the templates  
219 and models were assessed as previously described (Azad et al., 2011).

220

#### 221 *2.5. Determination of pore diameter and pore lining residues*

222 To analyze the MIP channels, the poreWalker server ([http://www.ebi.ac.uk/thornton-](http://www.ebi.ac.uk/thornton-srv/software/PoreWalker/)  
223 [srv/software/PoreWalker/](http://www.ebi.ac.uk/thornton-srv/software/PoreWalker/)) (Pellegrini-Calace et al., 2009) was used, which is a fully automated  
224 method designed to detect and characterize transmembrane protein channels from their 3D  
225 structures. The 3D structure of each MIP was uploaded to the server, which generated its

226 specific pore characteristics; in particular, the conformation and the regularity of the channel  
227 cavity, the corresponding pore lining residues and atoms, and the location of pore centers along  
228 the channel. The pore diameter at the ar/R selectivity filter was determined from the PoreWalker  
229 outputs as previously described (Azad et al., 2016). The pore lining residues, which are essential  
230 for channel formation, were identified using the PoreWalker server.

231

### 232 **3. Results**

#### 233 *3.1. Genome-wide identification of PinMIP, PpaMIP, PsoMIP, PraMIP, PcaMIP, and PciMIP* 234 *genes*

235 The whole genome shotgun sequence (WGS) of *P. infestans*, *P. parasitica*, *P. sojae*, *P.*  
236 *ramorum*, *P. capsici*, and *P. cinnamomi* available at FungiDB was searched for *PinMIP*,  
237 *PpaMIP*, *PsoMIP*, *PraMIP*, *PcaMIP*, and *PciMIP* genes using TBLASTN. The query *PinMIP*,  
238 *PpaMIP*, *PsoMIP*, *PtMIPs*, *PpMIPs* and *MAQPs* sequences resulted in 21, 27, and 33 hits for  
239 *PinMIP*, *PpaMIP*, and *PsoMIP*, respectively. We further analyzed the *PinMIP*, *PpaMIP*, and  
240 *PsoMIP* sequences for manual inspection of their amino acid sequences, TM domains, and  
241 homology models. After all these analysis, we found that out of 21, 27, and 33 hits for *PinMIP*,  
242 *PpaMIP*, and *PsoMIP*, respectively, 4, 3, and 6 were deemed to be pseudo *MIP* genes in *P.*  
243 *infestans*, *P. parasitica*, *P. sojae*, respectively, and were discarded. Characteristics, such as short  
244 sequences, N- or C-termini less, addition or deletion of sequences, and combinations thereof  
245 were observed in the discarded *MIPs*. However, the query *PraMIP*, *PcaMIP*, and *PciMIP*  
246 returned no hits in the TBLASTN and BLASTp searches. Therefore, we retrieved the *MIP*  
247 sequences of *P. ramorum*, *P. capsici*, and *P. cinnamomi* from the FungiDB and analyzed them  
248 as mentioned above. Out of 32 *MIP* sequences in each of *P. ramorum*, *P. capsici*, and *P.*  
249 *cinnamomi*, 13 *MIPs* in the former two and 10 *MIPs* in the latter were deemed pseudo *MIPs* for

250 the reasons noted above and were discarded. We ultimately obtained 17, 24, 27, 19, 19, and 22  
251 full-length PinMIP, PpaMIP, PsoMIP, PraMIP, PcaMIP, and PciMIP protein sequences from the  
252 WGS of *P. infestans*, *P. parasitica*, *P. sojae*, *P. ramorum*, *P. capsici*, and *P. cinnamomi*,  
253 respectively (Tables 1-6). The amino acid lengths of PinMIP, PpaMIP, PsoMIP, PrMIP,  
254 PcaMIP, and PciMIP homologues with their maximum sequence identity with MIPs in other  
255 *Phytophthora*, humans (taxid 9606), *Arabidopsis thaliana* (taxid 3702), fungi (taxid 4751), and  
256 algae (taxid 3027) are tabulated in Tables 1–6. Although the MIPs of one *Phytophthora* species  
257 exhibited a maximum 80–95% identity with those of other *Phytophthora* species (Tables 1-6),  
258 the TBLASTN search revealed that their highest identity with MIPs of *Arabidopsis thaliana*  
259 (taxid: 3702), *Homo sapiens* (taxid: 9606), fungi (taxid: 4751), and algae (taxid: 3027) was  
260 within 33, 45, 52, and 32%, respectively (Tables 1-6). This result indicated that PMIPs have  
261 higher identity with MIPs of fungi compared to those of animals, plants, and algae. This result  
262 further supported the notion that PMIPs might have extensive divergence in their sequence and  
263 structural properties compared to those in other taxonomic groups.

264  
265 The Ka/Ks value was >1 only for *PinMIPC1;2* and *PsoMIPG1;9*, indicating that the evolution  
266 of these genes in *P. infestans* and *P. sojae*, respectively, was likely under positive or Darwinian  
267 selection (Tables 1-6). The Ka/Ks value 0 for *PpaMIPC1;3*, *PsoMIPG1;8*, *PraMIPG1;2*, and  
268 *PraMIPG1;3* indicated neutral selection. The remaining PMIPs showed Ka/Ks values <1,  
269 demonstrating purifying selection. The score of the Cello prediction system showed that all  
270 PMIPs might have been localized in the plasma membrane (Supplementary Table S1). However,  
271 WoLF PSORT scores suggested that some PMIPs have possibility to localize in other  
272 intragranular membranes, such as the cytoskeleton, endoplasmic reticulum, vacuole, golgi, and  
273 mitochondria.

274

### 275 3.2. Phylogenetic distribution and nomenclature of PMIPs

276 The sequence of PMIPs was routinely compared with the subfamilies of those in other  
277 kingdoms by constructing multiple and/or pair-wise alignments using Clustal Omega and  
278 EMBOSS Needle, respectively. To investigate the structural conservation of PMIPs with other  
279 MIPs in plants, animals, and microbes, a 3D structural alignment was constructed with the  
280 templates of human AQP1 (PDB ID, 1J4N), spinach plasma membrane intrinsic protein,  
281 SoPIP2;1 (PDB ID, 2B5F), and *E. coli* glycerol facilitator, GlpF (PDB ID, 1FX8). All 3D  
282 models constructed with these three templates showed the typical hourglass shaped AQPs with  
283 six TM helices and five connecting loops (Figure 1). Superposition of the three models of each  
284 PMIP showed that the helices superposed very closely. Deviation was observed only in the  
285 loops. This structural alignment was used as a guide for sequence alignment. To classify the  
286 PMIPs, their protein sequences were analyzed phylogenetically with representatives of  
287 subfamilies of MIPs in two plant genomes, and a human, fungi, and algae genome, as described  
288 in Materials and Methods. Although PtMIPs and PpMIPs were divided into five and seven  
289 subfamilies, respectively (Danielson and Johanson, 2008; Gupta and Sankararamakrishnan,  
290 2009), and those in fungi and algae were separated into 10 and seven subfamilies, respectively  
291 (Anderberg et al., 2011; Verma et al., 2014), PMIPs formed a completely distinct clade (Figure  
292 2). Despite one MIP in *P. parasitica*, which was associated with Delta AQGs of fungi (Verma  
293 et al., 2014), no other PMIP was associated with any subfamilies of MIPs in other organisms in  
294 the three domains of life. We therefore constructed a phylogenetic tree with all 126 MIP  
295 homologues in the six *Phytophthora* species (Figure 3 and supplementary figure S1). The 126  
296 MIPs were clustered into nine subgroups. Because the PMIPs were not phylogenetically

297 clustered with any subfamily or group of MIPs reported in plants, animals, fungi, algae, or  
298 bacteria, these groups were arbitrarily named MIPA-MIPI. Each MIP homologue in every  
299 *Phytophthora* species was named by taking the first letter (Upper case) from the genus and the  
300 first two letters (lower case) of the species names with the MIP group (A to I), and the number  
301 of the homologues in each group was stated consecutively, i.e., PsoMIPA1;1 for MIPA in *P.*  
302 *sojae* and so on. MIPAs and MIPCs-MIPGs included one to several MIPs from each of the six  
303 *Phytophthora* species. MIPBs contained five homologues of five species, except *P. capsici*, and  
304 MIPHs consisted of four MIPs from three *Phytophthora* species. The MIPI group had only one  
305 homologue, which was Delta AQGP, as previously mentioned. However, although these groups  
306 included a small number of MIP homologues, they had a distinct ar/R constriction. The  
307 characteristics of each of the nine PMIPs groups are detailed in the next sections.

308  
309

### 310 3.3. Sequence analysis of PMIPs

311 We calculated the pair-wise sequence identity and similarity among the intragroup and  
312 intergroup PMIPs by using EMBOSS Needle ([http://www.ebi.ac.uk/Tools/psa/emboss\\_needle/](http://www.ebi.ac.uk/Tools/psa/emboss_needle/)).  
313 The average identity and similarity among the intragroup PMIPs was 76% and 83%,  
314 respectively, whereas those in the intergroup PMIPs were 40 and 52%, respectively  
315 (Supplementary Table S2). However, the sequence identity and similarity of MIPHs to MIPA-  
316 MIPGs was only 34 and 48%, respectively. Nevertheless, the intergroup average sequence  
317 identity among MIPAs-MIPDs and MIPes-MIPGs was 46 and 50% and similarity was 64 and  
318 62%, respectively. In contrast, the intergroup average sequence identity and similarity of PMIPs  
319 from MIPAs-MIPDs to MIPes-MIPGs was 48 and 63%, respectively. These results indicated  
320 that PMIPs of MIPAs-MIPDs were closer compared to those of MIPes-MIPGs and vice versa.  
321 The intergroup sequence identity varied from 2 to 30% and similarity varied from 1 to 56%,

322 indicating that each group was divergent from the others.

323

### 324 3.4. Gene structure of MIPs in *Phytophthora* species

325 All the full-length MIP sequences found in *P. infestans*, *P. parasitica*, *P. sojae*, *P. ramorum*, *P.*  
326 *capsici*, and *P. cinnamomi* were analyzed for introns and exons (Figure 4). Interestingly, among  
327 the 126 PMIPs, 107 homologues had no introns. This characteristic might be common to  
328 prokaryotic genes. Thirteen PMIPs had one introns. Two introns were observed in four PMIP  
329 genes, namely *PciMIPH1;1*, *PinMIPE1;1*, *PinMIPG1;2*, and *PsoMIPH1;1*. Three and five  
330 introns were found only in *PciMIPA1;4* and *PinMIPC1;3*, respectively. Despite a few  
331 disparities, conserved intron positions were not found in PMIPs (Figure 4).

332

### 333 3.5. Analysis of ar/R selectivity filter and FPs of PMIPs

334 The amino acid residues in the ar/R selectivity filter and FPs are crucial for functional grouping  
335 and substrate selectivity of MIPs (Froger et al., 1998; Heymann and Engel, 2000; Hove and  
336 Bhave, 2011; Pommerrenig et al., 2015; Azad et al., 2016; Azad et al. 2018). To determine the  
337 residues in the ar/R selectivity filter and FPs, we constructed 3D models of all PMIPs. The  
338 structure-based alignments and multiple sequence alignments of PMIPs helped us to identify the  
339 four amino acid residues at the ar/R selectivity filter, and the five residues in the FPs. The  
340 residues at the ar/R selectivity filter and FPs in nine groups are shown in Figure 3. Although  
341 MIPs in plants and fungi conserve group-specific ar/R selectivity filters and FPs (Wallace and  
342 Roberts, 2004; Gupta and Sankararamakrishnan, 2009; Verma et al., 2014; Pommerrenig et al.,  
343 2015; Azad et al., 2016), the ar/R filter and FPs were identical in several groups of PMIPs  
344 (Figure 3). Despite a few disparities (*PciMIPA1;4*, *PsoMIPA1;4*, *PpaMIPA1;3*, and

345 PinMIPE1;2), the tetrad in the ar/R selectivity filter in MIPAs and MIPDs-MIPGs was WGYR,  
346 which was found in  $\beta$ -AQPGs in fungi (Verma et al., 2014). However, MIPBs, MIPCs, MIPHs,  
347 and MIPI contained group-specific ar/R selectivity filters, having the tetrad WGCR, WALR,  
348 WSLR, and WTAR, respectively, which are not usually observed in MIPs of other taxonomic  
349 groups. Nevertheless, the residue in the H5 position of the ar/R filter in PciMIPH1;1 and  
350 PsoMIPH1;1 was deleted. The ar/R selectivity filter, as the name suggests, usually consists of an  
351 aromatic residue and R, was found in the H2 and LE2 position, respectively. This was true for  
352 all PMIPs, although exceptions have been reported in plants, fungi, and algae (Gupta and  
353 Sankararamakrishnan, 2009; Anderberg et al., 2011; Verma et al., 2014; Azad et al., 2016). The  
354 H5 position in PMIPs is occupied by small residues (G/A/S), which is generally the case in  
355 many MIPs in plants (TIPs, NIPs, and SIPs), fungi, and algae (Anderberg et al., 2011; Verma et  
356 al., 2014; Azad et al., 2016). However, all PIPs in plants, most of the AQPs in mammals, and  
357 some groups of MIPs in algae conserved H, and some fungal, algal, and plant MIPs conserved  
358 L/I/V in the corresponding position ((Anderberg et al., 2011; Azad et al., 2012; Verma et al.,  
359 2014; Azad et al., 2016), Supplementary Figure S2). A/C/G/S/T residues are usually found in  
360 the LE1 position in MIPs of plants, animals, fungi, and algae (Anderberg et al., 2011; Verma et  
361 al., 2014; Azad et al., 2016). Except for some fungal MIPs, an aromatic residue is not usually  
362 available at the LE1 position in eukaryotes. Interestingly, most of the PMIPs (MIPAs, MIPDs-  
363 MIPGs) conserved the bulky hydrophobic aromatic Y in the LE1 position (Figure 3). The bulky  
364 aromatic W and Y in the H2 and LE1 positions in many PMIPs in the five groups collectively  
365 might have influenced the channel properties and their transport profile. Hydrophobic L, which  
366 is not generally found in MIPs of plants, animals, and algae, but available in some fungal MIPs,  
367 is conserved in homologues of MIPC and MIPH. This hydrophobic larger amino acid would  
368 have changed the channel property and transport profile compared to MIPs that have A/C/G/S/T

369 in the same position. Superposition of the 3D models of PMIPs with crystal structures of  
370 bacterial glycerol facilitator (Glps), bovine aquaporin 1 (AQP1), and spinach PIP, SoPIP2;1,  
371 or that of intergroup homologues revealed that the architecture of the ar/R selectivity filter in  
372 PMIPs would be influenced by the residue at the H5 and LE1 positions (Figure 5). However,  
373 this might be one of the reasons for transport selectivity. The conserved residue WGYR in the  
374 ar/R selectivity filter of PMIPAs and MIPDs-MIPGs indicated that their transport selectivity  
375 might be caused by another mechanism or they have the same transport profile.

376 The FPs, P1 from H3, P2 and P3 from LE, and P4 and P5 from H6 as described by Froger  
377 et al. (Froger et al., 1998) were YDRFW in MIPAs-MIPDs, excluding two homologues,  
378 PsoMIPA1;4 and PsoMIPA1;5, in which the F was substituted by G and W, respectively (Figure  
379 3). Although these FPs are diverse from MIPs in plants, animals, and algae, most of the groups of  
380 fungal MIPs conserve them (Supplementary Figure S2). In MIPes-MIPHs, the P2-P5 positions  
381 were conserved with DRFW, except PsoMIPF1;2, PpaMIPF1;3, PsoMIPF1;3, PcaMIPF1;2, and  
382 PciMIPF1;3, in which the W in the P5 position was substituted by L. The P1 position in these  
383 groups was diverse, Q/D in MIPes; D/N in MIPFs; Q in MIPGs; and H/N in MIPHs. The FPs in  
384 the MIPI (PpaMIPI1;1) was FDRCW.

385

### 386 *3.6. PMIPs with substituted NPA motifs*

387 The conserved NPA motifs in LB and LE were found in MIPAs, MIPBs, MIPDs, MIPI, and a  
388 subgroup of MIPCs, except PciMIPA1;4, in which the P of the NPA in LE was substituted by S  
389 (Figure 3). As reported for the small basic intrinsic proteins (SIPs) in all plants (Gomes et al.,  
390 2009; Azad et al., 2016), the homologues of MIPes-MIPGs conserved a usual NPA motif in the  
391 LE, but an unusual NPA motif in the LB, apart from PpaMIPG1;1 that contained the usual NPA  
392 in both loops and PinMIPG1;1, in which the N of the NPA in LE was substituted by K. However,



393 unlike SIPs, MIPes-MIPGs have high molecular weight with longer amino acid sequences.  
394 Moreover, although substitution of A by T or L in the NPA motif of LB is observed in SIPs  
395 (Verma et al., 2014; Azad et al., 2016), P was substituted by T in all MIPes and MIPGs. In seven  
396 homologues of MIPFs, P was substituted by C or S, and in six homologues of the same group, A  
397 was substituted by S. Interestingly, two MIP homologues from each of the six *Phytophthora*  
398 species had unusual NPA motifs both in LB and LE, and they were clustered as a subgroup in  
399 MIPCs. More intriguingly, the NPA motifs of LB and LE in MIPHs were substituted with ISV  
400 and S(P/V/I)N, respectively. The NIPs with unusual NPA motifs, where A was in LB and that in  
401 LE were substituted by S and V, respectively, had characteristic R-rich C-termini (Azad et al.,  
402 2016; Azad et al. 2018). However, MIPCs with both unusual NPA motifs had a RSxGPYE(Y/F)  
403 C-terminus followed by the group-conserved GYHH motif. Although MIPHs' C-termini have no  
404 such conserved sequences before the ExQH motif, they contain comparatively more charged  
405 residues (Supplementary Figure S3).

406

### 407 3.7. Group-specific consensus sequences/motif of PMIPs

408 We further compared the PMIPs sequences for group-specific consensus sequences. In the TM  
409 regions, the intergroup similarities among the PMIPs were very high. The group-specific  
410 deviation was particularly observed in the loops and N- and C-termini (Table 7). Most of the  
411 homologues in MIPes-MIPGs had longer N-termini compared to MIPAs-MIPCs  
412 (Supplementary Figure S3). Interestingly, MIPDs had short N- and C-termini. It is more  
413 intriguing that excluding only three PMIPs in group E (PinMIPe1;1, PcaMIPe1;1, and  
414 PpaMIPe1;1), all PMIPs conserved a positively charged histidine residue in the C-terminus.  
415 With this conserved H residue, all PMIPs conserved a group-specific motif (Table 7). Except  
416 MIPes and MIPHs, the C-termini in all PMIPs were H-enriched, to a greater extent in MIPAs

417 and MIPBs. The C-termini of MIPs were enriched with D and E and had di- or tri-acidic  
418 residues. Despite the NPA motifs in LB and LE, every loop (LA-LE) had group-conserved  
419 sequences (Table 7). However, the sequence shown in LB shared both TM2 and LB. In all  
420 PMIPs, the LE was longer, where two group-conserved sequences were observed. The first one  
421 composed of eight residues included the P2 position. The second consisted of six residues and  
422 was located downstream of the P3 position. We further identified group-specific consensus  
423 sequences, with one in each of TM3 and TM5, and two in TM4. In the upstream region of TM3,  
424 there was a YxxxQ motif in all PMIPs, in which xxx contained group-specific residues. In the  
425 consensus sequence composed of eleven residues (Pxxxxxxxx(M/S) in TM5, the interior  
426 positions were blocked with group-wise preserved residues. Nevertheless, the first group-wise  
427 conserved sequence located at the start of TM4 was composed of eight residues; and the second  
428 one located before the end of the TM4 was composed of seven residues.

429

#### 430 **4. Discussion**

431 MIPs have a main role in water and solute transport and aid in homeostasis during plant stress  
432 responses (Afzal et al., 2016). Recently, transcriptome data provided important clues about the  
433 involvement of MIPs in host-pathogen interactions (Galindo-González and Deyholos, 2016;  
434 Reeksting et al., 2016; Guo et al., 2017). Although there has been no study on PMIPs, in the  
435 present study, we identified and characterized a total of 126 MIP homologues from the genomes  
436 of six *Phytophthora* species, which cause severe economic losses because of devastating effects  
437 on numerous agriculturally and ornamentally important plants (Tyler et al., 2006; Haas et al.,  
438 2009; Lamour et al., 2012; Thines, 2014; Fawke et al., 2015; Derevnina et al., 2016; Wang et  
439 al., 2016). This study provided comparative information in context of genome-wide number,  
440 subclasses or groups, structural insight, and evolution of PMIPs relative to those in taxonomic

441 groups.

442

#### 443 *4.1. PMIPs are a new paradigm in microbial aquaporins*

444 Although the number of MIP homologues varies from organism to organism, plants  
445 comparatively have more homologues than animals and microbes. Although bacterial genomes  
446 have 1–2 and fugal and/or algal genomes have only 1–6 *MIP* genes (Wang et al., 2005;  
447 Anderberg et al., 2011; Azad et al., 2011; Verma et al., 2014), this study showed that the  
448 genomes of fungi-like *Phytophthora* species of oomycetes had 17–27 *MIP* genes (Tables 1-6).  
449 The number of *MIP* genes in the genomes of *Phytophthora* species was higher than that even in  
450 the human genome and almost similar to that in many plants (Maurel et al., 2015; Azad et al.,  
451 2016; Potokar et al., 2016). The increase in the number of PMIPs might be have been caused by  
452 gene duplication or horizontal gene transfer in addition to the polyploidy nature of *Phytophthora*  
453 spp. (Bancroft, 2001; Moore and Purugganan, 2003; Bertier et al., 2013). More interestingly,  
454 systematic searching and phylogenetic and structural analysis revealed that PMIPs were distinct  
455 and did not cluster to those in taxonomic groups (Figures 2, 3). Data collectively indicated that  
456 despite some fungal MIPs (Verma et al., 2014), PMIPs had distinct ar/R filter and FPs, and  
457 substitution in the conserved NPA motifs in comparison with those in plants, animals, and algae  
458 were divergent. The large numbers, phylogenetical and structural novelty of PMIPs reflected  
459 their wide diversity in function and physiological relevance.

460

#### 461 *4.2. Group-specific characteristic C-termini and consensus motifs likely to be associated with* 462 *novel functions*

463 The uneven length of N- and C-termini of PMIPs groups (Table 7, Supplementary Figure 3)  
464 might have affected their interaction with other molecules or physical interaction for

465 heteromerization of PMIPs (Fetter et al., 2004; Yaneff et al., 2014) because the protein termini  
466 were generally exposed on the surface of protein structures making them available for  
467 interaction (Jacob and Unger, 2007; Tanco et al., 2015). The physical interaction through  
468 heteromerization is one of the mechanisms for regulation of intrinsic permeability of MIPs  
469 (Yanef et al., 2014). The C-termini of proteins have been associated with diverse biological  
470 functions and processes, such as membrane integration of proteins, protein activity, protein  
471 sorting, post-translational modification, protein-protein interaction, or formation of protein  
472 complexes (Chung et al., 2002; Azad et al., 2008; Tanco et al., 2015). The conserved positively  
473 charged H residue in all PMIPs, which was included in the group-specific C-terminal motif  
474 (Table 7), is a novel character not observed in other MIPs. Furthermore, despite MIPs that are  
475 enriched with negatively charged D and E residues, the C-termini in most PMIPs were enriched  
476 with positively charged H, although its extent is group-specific (Supplementary Figure 3).  
477 Therefore, the distinctive C-termini in PMIPs might be associated with protein sorting, protein-  
478 protein interaction, post-translation modification, or other novel functions. KDEL, HDEL, or  
479 KKXX motifs in the C-termini of proteins are involved in the retention of protein in the  
480 endoplasmic reticulum and prevent them entering into the secretory pathway (Chung et al.,  
481 2002; Capitani and Sallese, 2009; Tanco et al., 2015). The NIPs with unusual NPA motifs in LB  
482 and LE, have a characteristic R-rich C-termini, which are not seen in NIPs with only one  
483 unusual NPA motif, and the R-rich C-termini are thought to be involved in structural  
484 stabilization of MIPs (Ishibashi, 2006; Worth and Blundell, 2010; Azad et al., 2016). Although a  
485 subgroup of MIPs with both unusual NPA motifs have no such R-rich C-termini, their  
486 conserved RSxGPYE(Y/F) sequence would have been involved in the same function in addition  
487 to the other aforementioned functions of C-termini because of having charged and  
488 phosphorylatable residues. Similarly, MIPs having both unusual NPA motifs would have

489 different functions because of the presence of comparatively more charged (20–40%) residues in  
490 the last 10 amino acids of the C-termini (Supplementary Figure 3). In contrast, SIPs with only  
491 one unusual NPA motif have K-rich C termini (Azad et al., 2016), which is a potential  
492 endoplasmic retention signal (Ishibashi, 2006; Gomes et al., 2009). However, MIPes-MIPGs  
493 have no such K-rich C-termini. It is usually supposed that MIPs with unusual NPA motifs are  
494 involved in non-aqua transport rather than water transport (Pommerrenig et al., 2015; Azad et  
495 al., 2016). However, water transport activity has been demonstrated in two AtSIP1s, but not in  
496 AtSIP2;1, and the latter is supposed to have non-aqua transport activity (Fetter et al., 2004).

497         Comparison of PMIPs with MIPs in other taxonomic groups revealed that the group-  
498 specific motifs or consensus sequences in PMIPs shown in Table 7 are distinct from the  
499 corresponding positions in MIPs of other domains of life (Supplementary Figure S2). However,  
500 some of these motifs or consensus sequences are partly similar to some of the fungal MIPs.  
501 Interestingly, the YxxxQ motif in TM3 is largely conserved in most MIPs of other taxonomic  
502 groups. This might have important structural roles in MIPs as is reported for NPA motifs.  
503 Some of the residues in the group-specific motif or consensus sequences are pore-lining  
504 (Supplementary Figure 3), which in turn, may influence the transport profiles of PMIPs.  
505 Experimentally proven non-aqua transporter MIPs in plants have substrate-specific signature  
506 sequences (SSSS) or specificity-determining positions (SDPs) in the NPA regions, ar/R filters,  
507 and FPs (Hove and Bhave, 2011; Azad et al., 2016). These SSSS and SDPs have been shown  
508 to be used as tools to predict non-aqua transport profiles of plant MIPs (Hove and Bhave, 2011;  
509 Azad et al., 2016; Azad et al. 2018). Based on the SSSS or SDPs in individual constrictions,  
510 several PMIPs were predicted to be non-aqua transporters (Supplementary Table S3).  
511 However, considering only the PMIPs commonly predicted by the SSSS or SDPs for all three  
512 constrictions, no PMIP was predicted to be non-aqua transporter. This result indicated that the

513 SSSS and SDPs of PMIPs in the three constrictions might be structurally distinct, which in  
514 turn, would have imparted novel functions to PMIPs. It will be interesting to conduct wet-lab  
515 experiments to determine the transport activities and elucidate the structure-function  
516 relationship of PMIPs.

517  
518 *4.3. PMIPs could be attractive targets for anti-Phytophthora disease*

519 As previously mentioned, *Phytophthora* spp. have been identified to cause devastating diseases  
520 in wide range of plants, including agriculturally and economically important crops, such as rice,  
521 potato, tomato, wheat, rye, barley, and fruits (Fawke et al., 2015; Reeksting et al., 2016; Wang  
522 et al., 2016). These plant pathogens display resistance to existing fungicides, indicating the  
523 necessity of new drugs to eradicate *Phytophthora* from crops. To develop new drugs and  
524 treatments, the physiology of these pathogenic *Phytophthora* need to be studied in detail,  
525 specifically the significance of membrane transporters such as MIPs in plant-*Phytophthora*  
526 interactions. Understanding the plant-*Phytophthora* interactions and the infection mechanism is  
527 tremendously important and will aid in developing anti-*Phytophthora* drugs. MIPs are known to  
528 transport water, glycerol, and other physiologically important small-uncharged solutes  
529 (Chaumont and Tyerman, 2014; Afzal et al., 2016; Azad et al., 2016). Our present study  
530 revealed that PMIPs are phylogenetically and structurally distinct from their counterpart in other  
531 taxonomic domains (Figures 2, 3). The ar/R selectivity filter of PMIPs is unique and  
532 hydrophobic in nature and is likely to transport novel hydrophobic solutes. The distinctive FPs  
533 and group-specific consensus motifs (Figure 3, Table 7) further support the same notion that  
534 PMIPs might have novel transport profiles, which might include essential interactors for plant-  
535 *Phytophthora* interactions. The nature of molecules that are transported through PMIPs and the  
536 role of group-specific consensus motifs that might have regulated the channel function must first

537 be experimentally investigated. Hence, PMIP channels in disease causing *Phytophthora* can be  
538 considered as attractive drug target like some AQP modulators that are promising agents for the  
539 treatment of human disorders (Huber et al., 2012). However, the revelation of 3D structures and  
540 crystallographic information of PMIPs will broaden the understanding of drug design against  
541 *Phytophthora*-mediated plant diseases.

542

## 543 **5. Conclusions**

544 After its discovery in the last decade of the twentieth century, the MIP has fascinated scientists  
545 with its potential to aid in understanding the molecular physiology of organisms and  
546 development of new innovative pharmacological agents for the treatment of human and plant  
547 diseases, owing to their potential structure and functions. The host-pathogen interactions at  
548 *Phytophthora*-induced infection require understanding at the molecular level. In this context,  
549 understanding the evolution, structure, function, and diversity of PMIP channels might be very  
550 significant. In the present study, a genome-wide identification of MIPs has been performed in  
551 six *Phytophthora* species, which are devastating plant pathogens and members of oomycetes, a  
552 distinct lineage of fungus-like eukaryotic microbes. Every *Phytophthora* genome encodes  
553 several-fold MIP homologues compared to other eukaryotic microbes, such as fungi and algae,  
554 even more than in the human genome, and a similar number of homologues as found in many  
555 plants. The PMIPs were phylogenetically and structurally distinct from their counterparts in  
556 other taxonomic domains. Sequence analysis and homology modeling studies indicated that the  
557 ar/R selectivity filter, Froger's positions, and group-specific consensus sequences/motifs in  
558 different loops and TM helices of PMIPs are distinct from those in other taxonomic domains.  
559 The substitutions in the conserved NPA motifs of many PMIPs were also unique. The data  
560 collectively support the notion that PMIPs might have novel functions and could be considered

561 attractive anti-*Phytophthora* targets. Currently, no functional studies are available on PMIPs.  
562 The present study has provided a picture of PMIPs with distinct evolutionary relationships and  
563 structural properties. However, wet-lab experiments are needed to find out the possible solutes  
564 that are transported through the PMIP channels and the importance of these channels in the  
565 *Phytophthora* life cycles.

566  
567  
568  
569

### **Acknowledgements**

570 JA and AH were supported by stipends from The University Grant Commission of Bangladesh.  
571 There was no additional external funding received for this study.

572

### **Author's contributions**

573  
574 AKA and JA conceived the project. AKA designed the work. JA, AH, MAA, MMH and MH  
575 carried out the work and participated in analysis with the close supervision of AKA. JA  
576 participated in draft preparation of some parts of the manuscript. AKA supervised all procedures  
577 and wrote the manuscript. TI and YS critically read the manuscript. All authors approved the  
578 final version of the manuscript.

579

580

### **Competing interests**

582 The authors declare that they have no competing interests.

583

584

585



## 586 References

- 587 Abascal, F., Irisarri, I. and Zardoya, R., 2014. Diversity and evolution of membrane intrinsic  
588 proteins. *Biochimica et Biophysica Acta (BBA)-General Subjects*, 1840(5), pp.1468-1481.
- 589 Afzal, Z., Howton, T., Sun, Y., Mukhtar, M.S., 2016. The roles of aquaporins in plant stress  
590 responses. *Journal of Developmental Biology* 4, 9.
- 591 Anderberg, H.I., Danielson, J.Å., Johanson, U., 2011. Algal MIPs, high diversity and conserved  
592 motifs. *BMC Evolutionary Biology* 11, 110.
- 593 Azad, A.K., Ahmed, J., Alum, M.A., Hasan, M.M., Ishikawa, T., Sawa, Y., Katsuhara, M., 2016.  
594 Genome-wide characterization of major intrinsic proteins in four grass plants and their non-  
595 aqua transport selectivity profiles with comparative perspective. *PloS One* 11, e0157735.
- 596 Azad AK, Ahmed J, Alum MA, Md. Hasan M, Ishikawa T, Sawa Y (2018) Prediction of Arsenic and  
597 Antimony Transporter Major Intrinsic Proteins from the Genomes of Crop Plants. *International*  
598 *Journal of Biological Macromolecules*, 107: 2630-2642.
- 599 Azad, A.K., Hanawa, R., Ishikawa, T., Sawa, Y., Shibata, H., 2013. Expression profiles of  
600 aquaporin homologues and petal movement during petal development in *Tulipa gesneriana*.  
601 *Physiologia plantarum* 148, 397-407.
- 602 Azad, A.K., Katsuhara, M., Sawa, Y., Ishikawa, T., Shibata, H., 2008. Characterization of four  
603 plasma membrane aquaporins in tulip petals: a putative homolog is regulated by  
604 phosphorylation. *Plant and Cell Physiology* 49, 1196-1208.
- 605 Azad, A.K., Sato, R., Ohtani, K., Sawa, Y., Ishikawa, T., Shibata, H., 2011. Functional  
606 characterization and hyperosmotic regulation of aquaporin in *Synechocystis* sp. PCC 6803.  
607 *Plant Science* 180, 375-382.
- 608 Azad, A.K., Sawa, Y., Ishikawa, T., Shibata, H., 2004. Phosphorylation of plasma membrane  
609 aquaporin regulates temperature-dependent opening of tulip petals. *Plant and Cell*  
610 *Physiology* 45, 608-617.
- 611 Azad, A.K., Yoshikawa, N., Ishikawa, T., Sawa, Y., Shibata, H., 2012. Substitution of a single  
612 amino acid residue in the aromatic/arginine selectivity filter alters the transport profiles of  
613 tonoplast aquaporin homologs. *Biochimica et Biophysica Acta (BBA)-Biomembranes* 1818,  
614 1-11.
- 615 Baker, N., Glover, L., Munday, J.C., Andrés, D.A., Barrett, M.P., De Koning, H.P., Horn, D., 2012.  
616 Aquaglyceroporin 2 controls susceptibility to melarsoprol and pentamidine in African  
617 trypanosomes. *Proceedings of the National Academy of Sciences* 109, 10996-11001.
- 618 Bancroft, I., 2001. Duplicate and diverge: the evolution of plant genome microstructure. *Trends in*  
619 *Genetics* 17, 89-93.
- 620 Beakes, G.W., Glockling, S.L., Sekimoto, S., 2012. The evolutionary phylogeny of the oomycete  
621 “fungi”. *Protoplasma* 249, 3-19.
- 622 Beitz, E., 2005. Aquaporins from pathogenic protozoan parasites: structure, function and potential  
623 for chemotherapy. *Biology of the Cell* 97, 373-383.
- 624 Bertier, L., Leus, L., D’hondt, L., de Cock, A.W., Höfte, M., 2013. Host adaptation and speciation  
625 through hybridization and polyploidy in *Phytophthora*. *PloS one* 8, e85385.
- 626 Blackman, L.M., Cullerne, D.P., Torreña, P., Taylor, J., Hardham, A.R., 2015. RNA-Seq analysis of  
627 the expression of genes encoding cell wall degrading enzymes during infection of lupin  
628 (*Lupinus angustifolius*) by *Phytophthora parasitica*. *PloS one* 10, e0136899.
- 629 Capitani, M., Sallese, M., 2009. The KDEL receptor: new functions for an old protein. *FEBS Letters*  
630 583, 3863-3871.
- 631 Chaumont, F., Tyerman, S.D., 2014. Aquaporins: highly regulated channels controlling plant water

- 632 relations. *Plant Physiology* 164, 1600-1618.
- 633 Chung, J.-J., Shikano, S., Hanyu, Y., Li, M., 2002. Functional diversity of protein C-termini: more  
634 than zipcoding? *Trends in cell biology* 12, 146-150.
- 635 Danielson, J.Å., Johanson, U., 2008. Unexpected complexity of the aquaporin gene family in the  
636 moss *Physcomitrella patens*. *BMC Plant Biology* 8, 45.
- 637 Danielson, J.Å., and Johanson, U. (2010) Phylogeny of major intrinsic proteins. MIPs and their role  
638 in the exchange of metalloids, edited by Tomas P. Jahn and Gerd P. Bienert. *Landes*  
639 *Bioscience and Springer Science+Business Media*, PP 19-31.
- 640 Derevnina, L., Petre, B., Kellner, R., Dagdas, Y.F., Sarowar, M.N., Giannakopoulou, A., De la  
641 Concepcion, J.C., Chaparro-Garcia, A., Pennington, H.G., van West, P., 2016. Emerging  
642 oomycete threats to plants and animals. *Phil. Trans. R. Soc. B* 371, 20150459.
- 643 Fadiel, A., Isokpehi, R.D., Stambouli, N., Hamza, A., Benammar-Elgaaied, A., Scalise, T.J., 2009.  
644 Protozoan parasite aquaporins. *Expert review of proteomics* 6, 199-211.
- 645 Fawke, S., Doumane, M., Schornack, S., 2015. Oomycete interactions with plants: infection  
646 strategies and resistance principles. *Microbiology and Molecular Biology Reviews* 79, 263-  
647 280.
- 648 Fetter, K., Van Wilder, V., Moshelion, M., Chaumont, F., 2004. Interactions between plasma  
649 membrane aquaporins modulate their water channel activity. *The Plant Cell* 16, 215-228.
- 650 Froger, A., Thomas, D., Delamarche, C., Tallur, B., 1998. Prediction of functional residues in water  
651 channels and related proteins. *Protein Science* 7, 1458-1468.
- 652 Fu, D., Libson, A., Miercke, L.J., Weitzman, C., Nollert, P., Krucinski, J., Stroud, R.M., 2000.  
653 Structure of a glycerol-conducting channel and the basis for its selectivity. *Science* 290, 481-  
654 486.
- 655 Galindo-González, L., Deyholos, M.K., 2016. RNA-seq Transcriptome Response of Flax (*Linum*  
656 *usitatissimum* L.) to the Pathogenic Fungus *Fusarium oxysporum* f. sp. lini. *Frontiers in plant*  
657 *science* 7.
- 658 Gao, Z., He, X., Zhao, B., Zhou, C., Liang, Y., Ge, R., Shen, Y., Huang, Z., 2010. Overexpressing a  
659 putative aquaporin gene from wheat, TaNIP, enhances salt tolerance in transgenic  
660 *Arabidopsis*. *Plant and Cell Physiology* 51, 767-775.
- 661 Giovannetti, M., Balestrini, R., Volpe, V., Guether, M., Straub, D., Costa, A., Ludewig, U.,  
662 Bonfante, P., 2012. Two putative-aquaporin genes are differentially expressed during  
663 arbuscular mycorrhizal symbiosis in *Lotus japonicus*. *BMC plant biology* 12, 186.
- 664 Gomes, D., Agasse, A., Thiébaud, P., Delrot, S., Gerós, H., Chaumont, F., 2009. Aquaporins are  
665 multifunctional water and solute transporters highly divergent in living organisms.  
666 *Biochimica et Biophysica Acta (BBA)-Biomembranes* 1788, 1213-1228.
- 667 Guo, S., Zuo, Y., Zhang, Y., Wu, C., Su, W., Jin, W., Yu, H., An, Y., Li, Q., 2017. Large-scale  
668 transcriptome comparison of sunflower genes responsive to *Verticillium dahliae*. *BMC*  
669 *Genomics* 18, 42.
- 670 Gupta, A.B., Sankararamkrishnan, R., 2009. Genome-wide analysis of major intrinsic proteins in  
671 the tree plant *Populus trichocarpa*: characterization of XIP subfamily of aquaporins from  
672 evolutionary perspective. *BMC Plant Biology* 9, 134.
- 673 Haas, B.J., Kamoun, S., Zody, M.C., Jiang, R.H., Handsaker, R.E., Cano, L.M., Grabherr, M.,  
674 Kodira, C.D., Raffaele, S., Torto-Alalibo, T., 2009. Genome sequence and analysis of the  
675 Irish potato famine pathogen *Phytophthora infestans*. *Nature* 461, 393-398.
- 676 Hansen, M., Kun, J.F., Schultz, J.E., Beitz, E., 2002. A Single, Bi-functional Aquaglyceroporin in  
677 Blood-stage *Plasmodium falciparum* Malaria Parasites. *Journal of Biological Chemistry* 277,  
678 4874-4882.

- 679 Hao, C., Xia, Z., Fan, R., Tan, L., Hu, L., Wu, B., Wu, H., 2016. De novo transcriptome sequencing  
680 of black pepper (*Piper nigrum* L.) and an analysis of genes involved in phenylpropanoid  
681 metabolism in response to *Phytophthora capsici*. *BMC Genomics* 17, 822.
- 682 Heymann, J.B., Engel, A., 2000. Structural clues in the sequences of the aquaporins. *Journal of*  
683 *Molecular Biology* 295, 1039-1053.
- 684 Hove, R.M., Bhave, M., 2011. Plant aquaporins with non-aqua functions: deciphering the signature  
685 sequences. *Plant molecular biology* 75, 413-430.
- 686 Huber, V.J., Tsujita, M., Nakada, T., 2012. Aquaporins in drug discovery and pharmacotherapy.  
687 *Molecular aspects of medicine* 33, 691-703.
- 688 Ishibashi, K., 2006. Aquaporin subfamily with unusual NPA boxes. *Biochimica et Biophysica Acta*  
689 (BBA)-Biomembranes 1758, 989-993.
- 690 Ishibashi, K., Hara, S., Kondo, S., 2009. Aquaporin water channels in mammals. *Clinical and*  
691 *Experimental Nephrology* 13, 107-117.
- 692 Jackson, K., Yin, J., Ji, P., 2012. Sensitivity of *Phytophthora capsici* on vegetable crops in Georgia  
693 to mandipropamid, dimethomorph, and cyazofamid. *Plant disease* 96, 1337-1342.
- 694 Jacob, E., Unger, R., 2007. A tale of two tails: why are terminal residues of proteins exposed?  
695 *Bioinformatics* 23, e225-e230.
- 696 Johnson, G.K., Rosana, B.O., Vijesh, K.I., Santhosh, E.J., Anandaraj, M., 2016. Interplay of genes  
697 in plant-pathogen interactions: In planta expression and docking studies of a beta 1, 3  
698 glucanase gene from *Piper colubrinum* and a glucanase inhibitor gene from *Phytophthora*  
699 *capsici*. *Physiology and molecular biology of plants: an international journal of functional*  
700 *plant biology* 22, 567-573.
- 701 Kroon, L., Bakker, F., Van Den Bosch, G., Bonants, P., Flier, W., 2004. Phylogenetic analysis of  
702 *Phytophthora* species based on mitochondrial and nuclear DNA sequences. *Fungal Genetics*  
703 *and Biology* 41, 766-782.
- 704 Kun, J.F., de Carvalho, E.G., 2009. Novel therapeutic targets in *Plasmodium falciparum*:  
705 aquaglyceroporins. *Expert opinion on therapeutic targets* 13, 385-394.
- 706 Lamour, K.H., Mudge, J., Gobena, D., Hurtado-Gonzales, O.P., Schmutz, J., Kuo, A., Miller, N.A.,  
707 Rice, B.J., Raffaele, S., Cano, L.M., 2012. Genome sequencing and mapping reveal loss of  
708 heterozygosity as a mechanism for rapid adaptation in the vegetable pathogen *Phytophthora*  
709 *capsici*. *Molecular Plant-Microbe Interactions* 25, 1350-1360.
- 710 Levitt, M., 1992. Accurate modeling of protein conformation by automatic segment matching.  
711 *Journal of Molecular Biology* 226, 507-533.
- 712 Li, T., Hu, Y.J., Hao, Z.P., Li, H., Wang, Y.S., Chen, B.D., 2013. First cloning and characterization  
713 of two functional aquaporin genes from an arbuscular mycorrhizal fungus *Glomus*  
714 *intraradices*. *New Phytologist* 197, 617-630.
- 715 Liu, P., Gong, J., Ding, X., Jiang, Y., Chen, G., Li, B., Weng, Q., Chen, Q., 2016. The L-type Ca<sup>2+</sup>-  
716 Channel Blocker Nifedipine Inhibits Mycelial Growth, Sporulation, and Virulence of  
717 *Phytophthora capsici*. *Frontiers in Microbiology* 7.
- 718 Lomsadze, A., Ter-Hovhannisyanyan, V., Chernoff, Y.O., Borodovsky, M., 2005. Gene identification in  
719 novel eukaryotic genomes by self-training algorithm. *Nucleic acids research* 33, 6494-6506.
- 720 Maurel, C., Boursiac, Y., Luu, D.-T., Santoni, V., Shahzad, Z., Verdoucq, L., 2015. Aquaporins in  
721 plants. *Physiological reviews* 95, 1321-1358.
- 722 Meng, Y., Huang, Y., Wang, Q., Wen, Q., Jia, J., Zhang, Q., Huang, G., Quan, J., Shan, W., 2015.  
723 Phenotypic and genetic characterization of resistance in *Arabidopsis thaliana* to the  
724 oomycete pathogen *Phytophthora parasitica*. *Frontiers in Plant Science* 6.
- 725 Montalvetti, A., Rohloff, P., Docampo, R., 2004. A functional aquaporin co-localizes with the

- 726 vacuolar proton pyrophosphatase to acidocalcisomes and the contractile vacuole complex of  
727 *Trypanosoma cruzi*. *Journal of Biological Chemistry* 279, 38673-38682.
- 728 Moore, R.C., Purugganan, M.D., 2003. The early stages of duplicate gene evolution. *Proceedings of*  
729 *the National Academy of Sciences* 100, 15682-15687.
- 730 Mukhopadhyay, R., Bhattacharjee, H., Rosen, B.P., 2014. Aquaglyceroporins: generalized metalloid  
731 channels. *Biochimica et Biophysica Acta (BBA)-General Subjects* 1840, 1583-1591.
- 732 Muto, Y., Segami, S., Hayashi, H., Sakurai, J., Murai-Hatano, M., Hattori, Y., Ashikari, M.,  
733 Maeshima, M., 2011. Vacuolar proton pumps and aquaporins involved in rapid internode  
734 elongation of deepwater rice. *Bioscience, Biotechnology, and Biochemistry* 75, 114-122.
- 735 Pellegrini-Calace, M., Maiwald, T., Thornton, J.M., 2009. PoreWalker: a novel tool for the  
736 identification and characterization of channels in transmembrane proteins from their three-  
737 dimensional structure. *PLoS Computational Biology* 5, e1000440.
- 738 Peng, Y., Lin, W., Cai, W., Arora, R., 2007. Overexpression of a *Panax ginseng* tonoplast aquaporin  
739 alters salt tolerance, drought tolerance and cold acclimation ability in transgenic *Arabidopsis*  
740 plants. *Planta* 226, 729-740.
- 741 Pettersson, N., Filipsson, C., Becit, E., Brive, L., Hohmann, S., 2005. Aquaporins in yeasts and  
742 filamentous fungi. *Biology of the Cell* 97, 487-500.
- 743 Pommerrenig, B., Diehn, T.A., Bienert, G.P., 2015. Metalloido-porins: Essentiality of Nodulin 26-  
744 like intrinsic proteins in metalloid transport. *Plant Science* 238, 212-227.
- 745 Potokar, M., Jorgačevski, J., Zorec, R., 2016. Astrocyte Aquaporin Dynamics in Health and Disease.  
746 *International Journal of Molecular Sciences* 17, 1121.
- 747 Reeksting, B.J., Olivier, N.A., Van den Berg, N., 2016. Transcriptome responses of an ungrafted  
748 *Phytophthora* root rot tolerant avocado (*Persea americana*) rootstock to flooding and  
749 *Phytophthora cinnamomi*. *BMC Plant Biology* 16, 205.
- 750 Sahoo, D.K., Abeysekara, N.S., Cianzio, S.R., Robertson, A.E., Bhattacharyya, M.K., 2017. A  
751 Novel *Phytophthora sojae* Resistance Rps12 Gene Mapped to a Genomic Region That  
752 Contains Several Rps Genes. *PLoS one* 12, e0169950.
- 753 Sonah, H., Deshmukh, R.K., Labbé, C., Bélanger, R.R., 2017. Analysis of aquaporins in  
754 Brassicaceae species reveals high-level of conservation and dynamic role against biotic and  
755 abiotic stress in canola. *Scientific Reports* 7.
- 756 Soveral, G., Casini, A., 2017. Aquaporin modulators: a patent review (2010–2015). *Expert opinion*  
757 *on therapeutic patents* 27, 49-62.
- 758 Sui, H., Han, B.-G., Lee, J.K., Walian, P., Jap, B.K., 2001. Structural basis of water-specific  
759 transport through the AQP1 water channel. *Nature* 414, 872-878.
- 760 Tajkhorshid, E., Nollert, P., Jensen, M.Ø., Miercke, L.J., O'connell, J., Stroud, R.M., Schulten, K.,  
761 2002. Control of the selectivity of the aquaporin water channel family by global orientational  
762 tuning. *Science* 296, 525-530.
- 763 Tanco, S., Gevaert, K., Damme, P., 2015. C-terminomics: Targeted analysis of natural and  
764 posttranslationally modified protein and peptide C-termini. *Proteomics* 15, 903-914.
- 765 Thines, M., 2014. Phylogeny and evolution of plant pathogenic oomycetes--a global overview.  
766 *European Journal of Plant Pathology* 138, 431.
- 767 Törnroth-Horsefield, S., Wang, Y., Hedfalk, K., Johanson, U., Karlsson, M., Tajkhorshid, E.,  
768 Neutze, R., Kjellbom, P., 2006. Structural mechanism of plant aquaporin gating. *Nature* 439,  
769 688-694.
- 770 Tyler, B.M., Tripathy, S., Zhang, X., Dehal, P., Jiang, R.H., Aerts, A., Arredondo, F.D., Baxter, L.,  
771 Bensasson, D., Beynon, J.L., 2006. *Phytophthora* genome sequences uncover evolutionary  
772 origins and mechanisms of pathogenesis. *Science* 313, 1261-1266.

- 773 Uehlein, N., Kaldenhoff, R., 2008. Aquaporins and plant leaf movements. *Annals of botany* 101, 1-  
774 4.
- 775 Verkman, A., 2012. Aquaporins in clinical medicine. *Annual Review of Medicine* 63, 303-316.
- 776 Verma, R.K., Prabh, N.D., Sankararamakrishnan, R., 2014. New subfamilies of major intrinsic  
777 proteins in fungi suggest novel transport properties in fungal channels: implications for the  
778 host-fungal interactions. *BMC Evolutionary Biology* 14, 173.
- 779 Wallace, I.S., Roberts, D.M., 2004. Homology modeling of representative subfamilies of  
780 *Arabidopsis* major intrinsic proteins. Classification based on the aromatic/arginine selectivity  
781 filter. *Plant Physiology* 135, 1059-1068.
- 782 Wang, X.-W., Guo, L.-Y., Han, M., Shan, K., 2016. Diversity, evolution and expression profiles of  
783 histone acetyltransferases and deacetylases in oomycetes. *BMC Genomics* 17, 927.
- 784 Wang, Y., Schulten, K., Tajkhorshid, E., 2005. What makes an aquaporin a glycerol channel? A  
785 comparative study of AqpZ and GlpF. *Structure* 13, 1107-1118.
- 786 Worth, C.L., Blundell, T.L., 2010. On the evolutionary conservation of hydrogen bonds made by  
787 buried polar amino acids: the hidden joists, braces and trusses of protein architecture. *BMC*  
788 *Evolutionary Biology* 10, 161.
- 789 Yaneff, A., Sigaut, L., Marquez, M., Alleva, K., Pietrasanta, L.I., Amodeo, G., 2014.  
790 Heteromerization of PIP aquaporins affects their intrinsic permeability. *Proceedings of the*  
791 *National Academy of Sciences* 111, 231-236.
- 792 Yoshida, K., Schuenemann, V.J., Cano, L.M., Pais, M., Mishra, B., Sharma, R., Lanz, C., Martin,  
793 F.N., Kamoun, S., Krause, J., 2013. The rise and fall of the *Phytophthora infestans* lineage  
794 that triggered the Irish potato famine. *elife* 2, e00731.
- 795 Zhang, D.Y., Ali, Z., Wang, C.B., Xu, L., Yi, J.X., Xu, Z.L., Liu, X.Q., He, X.L., Huang, Y.H.,  
796 Khan, I.A., 2013. Genome-wide sequence characterization and expression analysis of major  
797 intrinsic proteins in soybean (*Glycine max* L.). *PLoS One* 8, e56312.
- 798

799  
800  
801  
802  
803  
804  
805  
806  
807  
808  
809  
810  
811  
812  
813  
814  
815  
816  
817  
818

819 **Figure legends**

820  
821 **Figure 1.** Superposition of representative 3D models of PcaMIPC1;1 constructed with the  
822 template AQP1 (red), GlpF (violet), and SoPIP2;1 (green). A and B are side and top views of  
823 the superposed models, respectively. The 3D models of all PMIPs were first constructed  
824 separately with AQP1, GlpF, and SoPIP2;1, and then the model of PcaMIPC1;1 as  
825 representative of PMIPs was superposed. The TM  $\alpha$ -helices (H1-H6) and loops (LA-LE) are  
826 indicated. The NPA motifs in LB and LE are shown as sticks. The residues that form the  
827 aromatic/arginine (ar/R) tetrad in the superposed structures are shown as sticks (B). The TM  $\alpha$ -  
828 helices and the loops to which these residues belong are indicated.

829  
830 **Figure 2.** Evolutionary relationship of MIPs in the six *Phytophthora* species. Phylogenetic  
831 analysis of all PMIPs from the six *Phytophthora* species is shown along with MIPs from *Populus*  
832 *trichocarpa* (PtMPs; PtPIPs, PtTIPs, PtNIPs, PtSIPs, and PtXIPs), *Physcomitrella patens*  
833 (PpMIPs), and human (MAQP), and five representative members from each of 10 subfamilies of  
834 MIPs in fungi (Verma et al. 2014; AQPs, Alpha AQGPs, Beta AQGPs, Gamma 1 AQGPs,  
835 Gamma 2 AQGPs, Delta AQGPs, Fps like AQGPs, XIPs, SIP-like Fungus MIP, and Yfl054-like  
836 AQGPs) and all MIPs in the genomes of nine algae (Anderberg et al. 2011; all homologues start  
837 with 'A'). The deduced amino acid sequences of MIPs were aligned using the Clustal Omega  
838 computer program and a phylogenetic tree was constructed using MEGA. The evolutionary  
839 history was inferred using the Bootstrap Neighbor-Joining (1000 replicates) method and the  
840 genetic distance was estimated by the p-distance method. PMIPs are shown with cyan  
841 background. All PMIPs, except PpaMIP1;1, formed a distinct clade and did not cluster with any  
842 subfamily or group of MIPs in plants, humans, fungi, or algae. Only PPaMIP1;1 clustered with  
843 fungal MIP Delta AQGPs.

844  
845 **Figure 3.** Grouping of MIPs from *Phytophthora* species based on phylogeny showing ar/R  
846 selectivity filter, NPA motifs, FPs, and diameter in the ar/R selectivity filter region. The  
847 phylogenetic tree was generated as described in Figure 2. The residues in the ar/R selectivity  
848 filter, NPA motifs, and the FPs were selected from the 3D models, as well as from the alignment  
849 shown in Supplementary Figures S3. The pore diameter at the ar/R region, which is considered  
850 one of the reasons for transport selectivity, was determined as described in the methods and  
851 tabulated on the right side.

852  
853 **Figure 4.** Gene structure of MIPs from *Phytophthora* species. Exon-intron organizations of *MIP*  
854 genes from *Phytophthora* species were depicted as described in the methods. The *PMIPs* having  
855 introns are mentioned in the second column. The six TM regions are shown as black bars and  
856 the loops B and E are shown in diamond shapes. The intron positions are indicated by inverted  
857 triangles. The number within the parenthesis in the first column indicates the total number of  
858 PMIP homologues.

859  
860 **Figure 5.** Superposition of 3D models of representative PMIP homologues of group A, B, C,  
861 and H. The 3D models of all PMIPs were first constructed separately with SoPIP2;1, and then  
862 the models of PciMIPA1;1 (red), PciMIPB1;1 (green), PciMIPC1;1 (yellow), and PciMIPH1;2  
863 (cyan) were superposed (A). The 3D models of PciMIPA1;1 (B), PciMIPB1;1 (C),  
864 PciMIPC1;1(D), and PciMIPH1;2 (E) were separately superposed with the template SoPIP2;1.  
865 The SoPIP2;1 is shown in green and the PMIP models are in red (B-E). The residues that form  
866 the aromatic/arginine (ar/R) tetrad in the superposed structures are shown as sticks. The TM  $\alpha$ -  
867 helices and the loops to which these residues belong are indicated.

868

869 **Supplementary Figure S1: Grouping of MIPs from *Phytophthora* species based on**  
870 **phylogeny.** The phylogenetic tree was generated as described in Figure 2. Each MIP group is  
871 shown with a specific background color to distinguish them from others.

872  
873 **Supplementary Figure S2: Multiple alignment of MIPs shown in Figure 2.** The amino acid  
874 sequences were aligned using the Clustal Omega program. The TM helices and the dual NPA  
875 motifs are shown as gray and yellow, respectively. The residues in the ar/R selectivity filter and  
876 FP are green and cyan boxed, respectively.

877  
878 **Supplementary Figure S3: Multiple sequence alignment of MIPs in the six *Phytophthora***  
879 **species.** The amino acid sequences were aligned using the Clustal Omega program. Each MIP  
880 group is shown with a specific background color to distinguish them from others. The TM  
881 helices are shown within boxes with black lines and the dual NPA motifs are shown as gray.  
882 The residues in the ar/R selectivity filter and FP are red and blue boxed, respectively. The region  
883 of the TM helices and loops from which consensus sequences or motifs were depicted in Table 7  
884 are green boxed. The pore-lining residues are indicated by arrows above the alignment and the  
885 conserved residues are indicated by stars (\*) at the bottom of the alignment.

886

887 **Supplementary Table S1:** Predicted sub-cellular localization of PMIPs

888

889 **Supplementary Table S2:** Average pairwise sequence identity and similarity between different  
890 PMIP groups.



891 **Table 1: MIP genes in *P. infestans* identified from the whole genome shotgun (WGS).**

892

| Gene Name         | Accession No. |              | Genomic location                 | PPL (aa) | Maximum identity with MIP (%) in |                   |                               |                   |                   | Ka/Ks Value |
|-------------------|---------------|--------------|----------------------------------|----------|----------------------------------|-------------------|-------------------------------|-------------------|-------------------|-------------|
|                   | Fungi DB      | NCBI         |                                  |          | Phytophthora                     | Human taxid 9606  | <i>A. thaliana</i> taxid 3702 | Fungi taxid 4751  | Algae taxid 3027  |             |
|                   |               |              |                                  |          |                                  |                   |                               |                   |                   |             |
| <i>PinMIPAI;1</i> | PITG_09354    | XP_002903624 | DS028131:2,512,989..2,513,854(+) | 263      | KUF83438 (83) <sup>c</sup>       | BAA24864 (38)     | OAO95087 (33)                 | XP_016613015 (47) | XP_005824571 (26) | 0.2387      |
| <i>PinMIPAI;2</i> | PITG_09355    | XP_002903625 | DS028131:2,546,498..2,547,370(+) | 290      | ETI40982 (96) <sup>a</sup>       | BAA24864 (43)     | NP_198598 (31)                | XP_016613015 (51) | XP_005824571 (30) | 0.2434      |
| <i>PinMIPAI;3</i> | PITG_09356    | XP_002903626 | DS028131:2,548,127..2,549,032(+) | 301      | ETP38902 (93) <sup>a</sup>       | EAW53211(43)      | AAF30303 (31)                 | XP_016613015 (51) | XP_005824571 (29) | 0.4144      |
| <i>PinMIPBI;1</i> | PITG_09350    | XP_002903621 | DS028131:2,486,995..2,487,897(+) | 300      | XP_008894610 (95) <sup>a</sup>   | XP_016870189(40)  | NP_198597 (28)                | XP_016613015 (47) | XP_005826812 (29) | 0.5579      |
| <i>PinMIPCI;1</i> | PITG_08296    | XP_002903694 | DS028130:793,924..794,826(+)     | 300      | XP_002903695 (99) <sup>b</sup>   | EAW53211 (39)     | NP_174472 (29)                | XP_016613015 (40) | XP_005824571 (28) | 0.1783      |
| <i>PinMIPCI;2</i> | PITG_08297    | XP_002903695 | DS028130:798,418..799,320(-)     | 300      | XP_002903694 (99) <sup>b</sup>   | EAW53211 (39)     | NP_174472 (30)                | XP_016613015 (41) | XP_005824571 (27) | 3.4424      |
| <i>PinMIPCI;3</i> | PITG_01100    | XP_002909619 | DS028118:6,345,258..6,347,464(-) | 364      | XP_002909620(81) <sup>a</sup>    | XP_011508406 (37) | NP_198597 (29)                | KIK26743 (40)     | XP_005824571 (26) | 0.8084      |
| <i>PinMIPCI;4</i> | PITG_01101    | XP_002909620 | DS028118:6,347,827..6,348,720(+) | 297      | ETP27623 (98) <sup>a</sup>       | EAW53211 (38)     | NP_178191 (32)                | KNE66934 (42)     | XP_005824571 (26) | 0.4934      |
| <i>PinMIPDI;1</i> | PITG_09383    | XP_002903644 | DS028131:2,824,064..2,824,888(-) | 274      | XP_008894631(96) <sup>a</sup>    | NP_066190 (42)    | AAF30303 (33)                 | XP_016613015 (50) | XP_005824571 (30) | 0.1845      |
| <i>PinMIPDI;2</i> | PITG_09384    | XP_002903645 | DS028131:2,825,233..2,826,057(-) | 274      | ETO69638 (98) <sup>a</sup>       | NP_066190 (42)    | OAO95087 (32)                 | KNE66934 (47)     | XP_005824571 (27) | 0.1479      |
| <i>PinMIPDI;3</i> | PITG_09386    | XP_002903646 | DS028131:2,830,938..2,831,762(+) | 274      | ETK81038 (98) <sup>a</sup>       | NP_066190 (43)    | NP_198598 (28)                | KNE66934 (46)     | XP_005824571 (27) | 0.118       |
| <i>PinMIPEI;1</i> | PITG_09203    | XP_002903501 | DS028131:1,363,292..1,364,282(-) | 295      | KUF89515 (93) <sup>c</sup>       | NP_004916 (36)    | OAO95087 (30)                 | XP_016613015 (40) | XP_005824571 (26) | 0.2632      |
| <i>PinMIPEI;2</i> | PITG_09204    | XP_002903502 | DS028131:1,364,676..1,365,540(-) | 270      | XP_008894432(89) <sup>a</sup>    | BAA24864 (40)     | NP_174472 (31)                | XP_016613015 (44) | XP_005824571 (30) | 0.2192      |
| <i>PinMIPFI;1</i> | PITG_09091    | XP_002903420 | DS028131:283,842..284,768(+)     | 308      | ETP11188 (96) <sup>a</sup>       | BAA24864 (40)     | OAP08944 (33)                 | XP_016613015 (43) | XP_005824571 (28) | 0.4186      |
| <i>PinMIPGI;1</i> | PITG_09197    | XP_002903496 | DS028131:1,281,315..1,282,223(-) | 302      | ETO69869 (87) <sup>a</sup>       | NP_066190 (39)    | AAM61294 (30)                 | XP_016613015 (49) | XP_005824571 (27) | 0.2059      |
| <i>PinMIPGI;2</i> | PITG_09196    | XP_002903495 | DS028131:1,266,835..1,267,745(-) | 272      | KUF89527 (85) <sup>c</sup>       | CAG46822 (39)     | CAA68906 (30)                 | CDO57616 (46)     | XP_005824571 (25) | 0.2134      |
| <i>PinMIPGI;3</i> | PITG_09193    | XP_002903492 | DS028131:1,254,794..1,255,735(-) | 313      | ETP10991(95) <sup>a</sup>        | EAW53211 (39)     | AAM61294 (31)                 | XP_016613015 (50) | XP_005826794 (28) | 0.1653      |

893 PPL: polypeptide length, aa: amino acid.

894 <sup>a</sup>*P. parasitica*, <sup>b</sup>*P. infestans*, <sup>c</sup>*P. nicotianae*

895 Parenthesis indicates the percentage of identity at the amino acid level

896

897

898 **Table 2: MIP genes in *P. parasitica* identified from the whole genome shotgun (WGS).**

899

| Gene Name         | Accession No. |              | Genomic location                 | PPL<br>(aa) | Maximum identity with MIP (%) in |                     |                                  |                   |                   | Ka/Ks<br>Value |
|-------------------|---------------|--------------|----------------------------------|-------------|----------------------------------|---------------------|----------------------------------|-------------------|-------------------|----------------|
|                   | Fungi DB      | NCBI         |                                  |             | Phytophthora                     | Human taxid<br>9606 | <i>A. thaliana</i><br>taxid 3702 | Fungi taxid 4751  | Algae taxid 3027  |                |
| <i>PpaMIPAI;1</i> | PPTG_21368    | XP_008894870 | KI669564:2,505,888..2,508,408(-) | 294         | ETM40999 (99) <sup>b</sup>       | BAA24864 (43)       | OAO95087 (33)                    | XP_016613015 (51) | XP_005824571 (31) | 0.242          |
| <i>PpaMIPAI;2</i> | PPTG_03679    | XP_008894612 | KI669564:2,503,959..2,504,957(-) | 290         | ETI40982 (99) <sup>b</sup>       | BAA24864 (43)       | NP_198598 (31)                   | XP_016613015 (51) | XP_005824571 (29) | 0.3506         |
| <i>PpaMIPAI;3</i> | PPTG_03683    | XP_008894614 | KI669564:2,516,194..2,517,439(+) | 311         | KUF81753 (99) <sup>a</sup>       | BAA24864 (43)       | NP_174472 (33)                   | XP_016613015 (51) | XP_005824571 (30) | 0.28           |
| <i>PpaMIPAI;4</i> | PPTG_03678    | XP_008894611 | KI669564:2,502,439..2,503,474(-) | 301         | ETP38902 (99) <sup>b</sup>       | BAA24864 (42)       | OAO95087 (31)                    | XP_016613015 (50) | XP_005824571 (29) | 0.2414         |
| <i>PpaMIPBI;1</i> | PPTG_03677    | XP_008894610 | KI669564:2,500,793..2,501,695(+) | 300         | XP_002903621(99) <sup>c</sup>    | NP_066190 (38)      | NP_198597 (29)                   | XP_016613015 (47) | XP_005826812 (29) | 0.4847         |
| <i>PpaMIPCI;1</i> | PPTG_12775    | XP_008908228 | KI669595:679,441..680,883(-)     | 300         | ETI42987 (99) <sup>b</sup>       | EAW53211 (42)       | NP_174472 (31)                   | XP_016613015 (42) | XP_005824571 (28) | 0.3463         |
| <i>PpaMIPCI;2</i> | PPTG_10261    | XP_008903172 | KI669579:270,346..271,914(-)     | 296         | XP_008903173 (99) <sup>b</sup>   | EAW53211 (39)       | NP_178191 (31)                   | KNE66934 (42)     | XP_005824571 (26) | 0.6476         |
| <i>PpaMIPCI;3</i> | PPTG_10262    | XP_008903173 | KI669579:273,175..274,136(+)     | 296         | ETP27623 (99) <sup>b</sup>       | EAW53211 (39)       | NP_178191 (31)                   | KNE66934 (42)     | XP_005824571 (26) | 0              |
| <i>PpaMIPDI;1</i> | PPTG_03700    | XP_008894631 | KI669564:2,594,866..2,595,834(-) | 274         | ETK81036 (99) <sup>b</sup>       | BAA24864 (43)       | NP_174472 (33)                   | XP_015224218 (46) | XP_005824571 (30) | 0.226          |
| <i>PpaMIPDI;2</i> | PPTG_03701    | XP_008894632 | KI669564:2,595,983..2,596,984(-) | 274         | ETP38884 (99) <sup>b</sup>       | BAA24864 (41)       | AAM65333 (31)                    | KNE66934 (48)     | XP_005824571 (26) | 0.1461         |
| <i>PpaMIPDI;3</i> | PPTG_03702    | XP_008894633 | KI669564:2,598,571..2,599,395(+) | 274         | KUF96448 (99) <sup>a</sup>       | BAA24864 (43)       | NP_198598 (29)                   | KNE66934 (46)     | 005824571 (27)    | 0.1638         |
| <i>PpaMIPEI;1</i> | PPTG_03509    | XP_008894431 | KI669564:1,787,887..1,789,461(-) | 328         | ETL87939 (99) <sup>b</sup>       | CAG46822 (40)       | NP_198597 (30)                   | XP_016613015 (44) | XP_005824571 (26) | 0.2602         |
| <i>PpaMIPEI;2</i> | PPTG_03510    | XP_008894432 | KI669564:1,789,897..1,790,946(-) | 349         | XP_002903502 (89) <sup>c</sup>   | NP_066190 (42)      | NP_174472 (29)                   | XP_016613015 (45) | XP_005824571 (29) | 0.2728         |
| <i>PpaMIPFI;1</i> | PPTG_03354    | XP_008894280 | KI669564:1,303,524..1,305,303(+) | 309         | KUF92657 (99) <sup>a</sup>       | NP_536354 (41)      | AAM61294 (30)                    | XP_016613015 (42) | XP_005824571 (29) | 0.3905         |
| <i>PpaMIPFI;2</i> | PPTG_03358    | XP_008894285 | KI669564:1,314,285..1,315,223(+) | 312         | ETP39322 (99) <sup>b</sup>       | NP_536354 (40)      | OAP08944.1 (32)                  | XP_018224918 (43) | XP_005824571 (28) | 0.2058         |
| <i>PpaMIPFI;3</i> | PPTG_03512    | XP_008894434 | KI669564:1,792,870..1,793,826(-) | 318         | ETL87944 (99) <sup>b</sup>       | NP_066190 (41)      | AAM61294 (31)                    | XP_016613015 (41) | XP_005824571 (28) | 0.3234         |
| <i>PpaMIPGI;1</i> | PPTG_03508    | XP_008894430 | KI669564:1,785,403..1,786,911(-) | 311         | ETO69869 (99) <sup>b</sup>       | EAW53211 (41)       | AAM61294 (31)                    | XP_016613015 (50) | XP_005824571 (27) | 0.2455         |
| <i>PpaMIPGI;2</i> | PPTG_03502    | XP_008894424 | KI669564:1,774,974..1,776,155(-) | 298         | ETO69896 (99) <sup>b</sup>       | EAW53211 (43)       | NP_174472 (32)                   | XP_016613015 (49) | XP_005836263 (32) | 0.286          |
| <i>PpaMIPGI;3</i> | PPTG_03507    | XP_008894429 | KI669564:1,784,034..1,785,409(-) | 346         | ETI41209 (99) <sup>b</sup>       | NP_004916 (43)      | NP_198597 (27)                   | XP_016613015 (45) | XP_005824571 (25) | 0.425          |
| <i>PpaMIPGI;4</i> | PPTG_03504    | XP_008894426 | KI669564:1,780,246..1,781,526(+) | 317         | ETP10991 (99) <sup>b</sup>       | EAW53211 (38)       | AAM61294 (30)                    | XP_016613015 (46) | XP_005826794 (28) | 0.2374         |
| <i>PpaMIPHI;1</i> | PPTG_03511    | XP_008894433 | KI669564:1,791,348..1,792,473(-) | 322         | KUF89513 (95) <sup>a</sup>       | BAA24864 (35)       | NP_198597 (26)                   | XP_016613015 (36) | XP_005840893 (25) | 0.6009         |
| <i>PpaMIPII;1</i> | PPTG_14248    | XP_008909057 | KI669599:124,031..125,191(-)     | 386         | ETL88792 (99) <sup>b</sup>       | NP_536354 (26)      | CAA16760 (27)                    | OAJ43010 (34)     | XP_005826812 (26) | 0.6177         |

900 PPL: polypeptide length, aa: amino acid; <sup>a</sup>*P. nicotianae*, <sup>b</sup>*P. parasitica*, <sup>c</sup>*P. infestans*; parenthesis indicates the percentage of identity at the amino acid level

901

902

903

904

905 **Table 3: MIP genes in *P. sojae* identified from the whole genome shotgun (WGS).**

| Gene Name         | Accession No.     |              | Genomic location                   | PP L (aa) | Maximum identity with MIP (%) in |                  |                               |                   |                   | Ka/Ks Value |
|-------------------|-------------------|--------------|------------------------------------|-----------|----------------------------------|------------------|-------------------------------|-------------------|-------------------|-------------|
|                   | Fungi DB          | NCBI         |                                    |           | Phytophthora                     | Human taxid 9606 | <i>A. thaliana</i> taxid 3702 | Fungi taxid 4751  | Algae taxid 3027  |             |
|                   |                   |              |                                    |           |                                  |                  |                               |                   |                   |             |
| <i>PsoMIPAI;1</i> | PHYSODRAFT_339641 | XP_009535925 | JH159160:2,208,709..2,209,590(-)   | 293       | XP_009535926 (92) <sup>b</sup>   | CAG46822 (48)    | OAO95087 (30)                 | XP_016613015 (52) | XP_005824571 (31) | 0.1184      |
| <i>PsoMIPAI;2</i> | PHYSODRAFT_288735 | XP_009535926 | JH159160:2,210,235..2,211,326(-)   | 294       | KUF83438 (92) <sup>d</sup>       | NP_004916(45)    | OAO95087 (32)                 | XP_016613015 (52) | XP_005824571 (30) | 0.247       |
| <i>PsoMIPAI;3</i> | PHYSODRAFT_525185 | XP_009535924 | JH159160:2,206,900..2,207,772(-)   | 290       | ETI40982 (96) <sup>a</sup>       | CAG46822 (48)    | XP_016613015 (52)             | XP_016613015 (52) | XP_005824571 (31) | 0.373       |
| <i>PsoMIPAI;4</i> | PHYSODRAFT_525056 | XP_009535927 | JH159160:2,214,127..2,215,062(+)   | 311       | ETP38886 (86) <sup>a</sup>       | EAW53211(42)     | NP_198597 (31)                | XP_016613015 (46) | XP_005824571 (30) | 0.2643      |
| <i>PsoMIPAI;5</i> | PHYSODRAFT_525520 | XP_009535923 | JH159160:2,205,229..2,206,137(-)   | 302       | XP_002903626(80) <sup>c</sup>    | NP_004916(45)    | OAO95087(31)                  | XP_016613015(49)  | XP_005824571(30)  | 0.2899      |
| <i>PsoMIPBI;1</i> | PHYSODRAFT_355956 | XP_009535922 | JH159160:2,203,313..2,204,352(+)   | 300       | XP_008894610(88) <sup>a</sup>    | NP_001161 (38)   | NP_198597 (28)                | XP_016613015 (44) | XP_005826812 (29) | 0.6376      |
| <i>PsoMIPCI;1</i> | PHYSODRAFT_330305 | XP_009525250 | JH159153:10,045,045..10,045,959(+) | 304       | XP_009529571(75) <sup>b</sup>    | EAW53211(40)     | NP_174472 (33)                | XP_016613015 (39) | XP_005824571(30)  | 0.2843      |
| <i>PsoMIPCI;2</i> | PHYSODRAFT_334026 | XP_009529571 | JH159155:4,679,293..4,680,189(+)   | 298       | XP_008908228 (95) <sup>a</sup>   | NP_536354(40)    | CAA68906 (31)                 | XP_016613015 (40) | XP_005824571 (28) | 0.2371      |
| <i>PsoMIPCI;3</i> | PHYSODRAFT_468333 | XP_009514460 | JH159151:2,362,247..2,363,155(-)   | 302       | XP_009514453 (75) <sup>b</sup>   | CAG46822 (42)    | NP_198597 (27)                | XP_016613015 (40) | XP_005824571 (26) | 0.3452      |
| <i>PsoMIPCI;4</i> | PHYSODRAFT_477070 | XP_009514453 | JH159151:2,342,386..2,343,285(-)   | 299       | XP_002909620 (83) <sup>a</sup>   | EAW53211(38)     | NP_198597 (27)                | KNE66934 (41)     | XP_005824571 (25) | 0.461       |
| <i>PsoMIPDI;1</i> | PHYSODRAFT_525349 | XP_009535952 | JH159160:2,282,738..2,283,562(-)   | 274       | XP_008894631 (97) <sup>a</sup>   | BAA24864 (43)    | AAF30303 (32)                 | XP_016613015 (50) | XP_005824571 (30) | 0.4964      |
| <i>PsoMIPDI;2</i> | PHYSODRAFT_524483 | XP_009535953 | JH159160:2,283,997..2,284,821(-)   | 274       | XP_002903645 (96) <sup>c</sup>   | BAA24864 (42)    | OAO95087 (32)                 | KNE66934 (49)     | XP_005824571 (25) | 0.2716      |
| <i>PsoMIPDI;3</i> | PHYSODRAFT_339665 | XP_009535954 | JH159160:2,286,447..2,287,271(+)   | 274       | ETK81038 (95) <sup>a</sup>       | BAA24864 (41)    | NP_198598 (29)                | KNE66934 (47)     | XP_005824571 (26) | 0.158       |
| <i>PsoMIPEI;1</i> | PHYSODRAFT_339490 | XP_009535744 | JH159160:1,691,393..1,692,387(-)   | 319       | ETL87939 (82) <sup>a</sup>       | NP_536354(36)    | NP_198597 (29)                | XP_016613015 (47) | XP_005826794 (25) | 0.361       |
| <i>PsoMIPFI;1</i> | PHYSODRAFT_252268 | XP_009535532 | JH159160:1,090,627..1,091,388(+)   | 253       | ETP11188 (88) <sup>a</sup>       | CAG46822 (41)    | AAM61294 (32)                 | XP_016613015 (47) | XP_005826812 (31) | 0.1857      |
| <i>PsoMIPFI;2</i> | PHYSODRAFT_259896 | XP_009535755 | JH159160:1,719,459..1,720,510(+)   | 340       | XP_009535748 (71) <sup>b</sup>   | BAA24864 (39)    | OAP08944 (32)                 | XP_016613015 (39) | XP_005826812 (31) | 0.2486      |
| <i>PsoMIPFI;3</i> | PHYSODRAFT_549775 | XP_009535748 | JH159160:1,700,410..1,703,096(-)   | 323       | XP_008894434 (88) <sup>a</sup>   | EAW53211(41)     | NP_198597 (30)                | XP_016613015 (49) | XP_005826794 (25) | 0.3053      |
| <i>PsoMIPGI;1</i> | PHYSODRAFT_355937 | XP_009535743 | JH159160:1,687,843..1,688,930(-)   | 304       | ETO69869 (89) <sup>a</sup>       | NP_066190(40)    | NP_174472 (30)                | XP_016613015 (52) | XP_005824571 (27) | 0.6348      |
| <i>PsoMIPGI;2</i> | PHYSODRAFT_524694 | XP_009535734 | JH159160:1,659,268..1,660,167(-)   | 299       | KUF84847 (91) <sup>d</sup>       | EAW53211(41)     | NP_180986 (29)                | XP_016613015 (48) | XP_005824571 (25) | 0.3263      |
| <i>PsoMIPGI;3</i> | PHYSODRAFT_549767 | XP_009535742 | JH159160:1,685,479..1,686,495(-)   | 265       | ETI41209 (93) <sup>a</sup>       | CAG46822 (44)    | NP_198597 (28)                | XP_016613015 (46) | XP_005824571 (24) | 0.1758      |
| <i>PsoMIPGI;4</i> | PHYSODRAFT_355919 | XP_009535727 | JH159160:1,644,341..1,647,821(-)   | 312       | KUF89525 (89) <sup>d</sup>       | EAW53211(40)     | AAM61294 (30)                 | XP_016613015 (46) | XP_005826794 (28) | 0.4995      |
| <i>PsoMIPGI;5</i> | PHYSODRAFT_339474 | XP_009535728 | JH159160:1,647,826..1,648,716(-)   | 296       | KUG01632 (89) <sup>d</sup>       | EAW53211 (39)    | AAM61294 (30)                 | XP_016613015 (48) | XP_005826794 (28) | 0.5854      |
| <i>PsoMIPGI;6</i> | PHYSODRAFT_549764 | XP_009535739 | JH159160:1,671,210..1,672,275(-)   | 322       | XP_009535740 (97) <sup>b</sup>   | EAW53211 (39)    | NP_192776 (30)                | XP_016613015 (51) | XP_005826794 (28) | 0.3187      |
| <i>PsoMIPGI;7</i> | PHYSODRAFT_524365 | XP_009535740 | JH159160:1,682,070..1,683,032(+)   | 320       | XP_009535739 (97) <sup>b</sup>   | EAW53211(40)     | NP_198597 (29)                | XP_016613015 (50) | XP_005826794 (27) | 0.1838      |
| <i>PsoMIPGI;8</i> | PHYSODRAFT_451744 | XP_009535736 | JH159160:1,664,850..1,665,770(-)   | 307       | XP_009535737 (99) <sup>b</sup>   | CAG46822 (40)    | NP_198597 (29)                | XP_016613015 (49) | XP_005824571 (25) | 0           |
| <i>PsoMIPGI;9</i> | PHYSODRAFT_452243 | XP_009535737 | JH159160:1,666,625..1,667,545(+)   | 307       | XP_009535736 (99) <sup>b</sup>   | CAG46822 (40)    | NP_198597 (29)                | XP_016613015 (49) | XP_005824571 (25) | 1.6327      |
| <i>PsoMIPHI;1</i> | PHYSODRAFT_259868 | XP_009535754 | JH159160:1,717,811..1,718,779(+)   | 247       | XP_008894433 (54) <sup>c</sup>   | BAA24864 (33)    | AAM61294 (28)                 | XP_016613015 (33) | XP_005824571 (26) | 0.4791      |

906 PPL: polypeptide length, aa: amino acid; <sup>a</sup>*P. parasitica*, <sup>b</sup>*P. sojae*, <sup>c</sup>*P. infestans*, <sup>d</sup>*P. nicotianae*, parenthesis indicates the percentage of identity at the amino acid level

907 **Table 4: MIP genes in *P. ramorum* identified from the whole genome shotgun (WGS).**

908

| Gene Name         | Accession No. |        | Genomic location                      | PPL (aa) | Maximum identity with MIP (%) in |                  |                               |                   |                   | Ka/Ks Value |
|-------------------|---------------|--------|---------------------------------------|----------|----------------------------------|------------------|-------------------------------|-------------------|-------------------|-------------|
|                   | Fungi DB      | N C BI |                                       |          | Phytophthora                     | Human taxid 9606 | <i>A. thaliana</i> taxid 3702 | Fungi taxid 4751  | Algae taxid 3027  |             |
| <i>PraMIPAI;1</i> | PSURA_84475   | -      | PramPr-102_SC0114:47,366..48,247(-)   | 293      | KUF83438 (92) <sup>d</sup>       | BAA24864 (41)    | NP_198598 (31)                | XP_016613015 (31) | XP_005824571 (29) | 0.1842      |
| <i>PraMIPAI;2</i> | PSURA_84474   | -      | PramPr-102_SC0114:45,578..46,447(-)   | 289      | ETI40982 (96) <sup>a</sup>       | BAA24864 (35)    | NP_198598 (31)                | XP_016613015 (49) | XP_005824571 (27) | 0.171       |
| <i>PraMIPAI;3</i> | PSURA_84476   | -      | PramPr-102_SC0114:50,260..51,177(-)   | 305      | ETP38886.1 (88) <sup>a</sup>     | EAW53211 (41)    | NP_198597 (30)                | XP_016613015 (45) | XP_005826794 (27) | 0.2641      |
| <i>PraMIPBI;1</i> | PSURA_72233   | -      | PramPr-102_SC0114:42,371..43,273(+)   | 300      | XP_008894610 (94) <sup>a</sup>   | NP_066190 (38)   | NP_198597 (29)                | XP_016613015 (46) | XP_005826812 (30) | 0.5878      |
| <i>PraMIPCI;1</i> | PSURA_71169   | -      | PramPr-102_SC0006:392,090..392,875(+) | 261      | XP_008908228 (94) <sup>a</sup>   | EAW53211 (40)    | AAM61294 (31)                 | XP_016613015 (41) | XP_005824571 (27) | 0.439       |
| <i>PraMIPCI;2</i> | PSURA_72183   | -      | PramPr-102_SC0102:39,914..40,669(-)   | 251      | XP_009514460 (94) <sup>b</sup>   | CAG46822 (41)    | AAM61294 (31)                 | XP_016613015 (39) | XP_005824571 (25) | 0.1716      |
| <i>PraMIPCI;3</i> | PSURA_72182   | -      | PramPr-102_SC0102:33,841..34,596(+)   | 251      | XP_009514453 (84) <sup>b</sup>   | CAG46822 (41)    | AAM61294 (30)                 | KNE66934 (42)     | XP_005824571 (28) | 0.212       |
| <i>PraMIPDI;1</i> | PSURA_72235   | -      | PramPr-102_SC0114:104,901..105,626(-) | 241      | XP_009535952 (96) <sup>b</sup>   | BAA24864 (44)    | NP_174472 (33)                | XP_016613015 (50) | XP_005824571 (30) | 0.1736      |
| <i>PraMIPDI;2</i> | PSURA_72236   | -      | PramPr-102_SC0114:106,106..106,930(-) | 274      | XP_002903645 (96) <sup>c</sup>   | NP_066190 (40)   | OAO95087 (31)                 | XP_016613015 (49) | XP_005824571 (26) | 0.1811      |
| <i>PraMIPDI;3</i> | PSURA_72237   | -      | PramPr-102_SC0114:108,512..109,339(+) | 275      | XP_009535954 (95) <sup>b</sup>   | NP_066190 (41)   | NP_198598 (29)                | KNE66934 (47)     | XP_005824571 (26) | 0.2497      |
| <i>PraMIPFI;1</i> | PSURA_80174   | -      | PramPr-102_SC0046:362,803..363,804(+) | 333      | XP_008894431 (87) <sup>a</sup>   | BAA24864 (40)    | NP_198597 (32)                | XP_016613015 (50) | XP_005824571 (26) | 0.4705      |
| <i>PraMIPFI;2</i> | PSURA_95006   | -      | PramPr-102_SC0029:82,759..83,706(+)   | 315      | ETP11188 (80) <sup>a</sup>       | BAA24864 (39)    | AAM61294 (31)                 | XP_016613015 (47) | XP_005824571 (27) | 0.1983      |
| <i>PraMIPFI;3</i> | PSURA_80164   | -      | PramPr-102_SC0046:326,376..327,332(+) | 318      | ETP11188 (83) <sup>a</sup>       | BAA24864 (38)    | AAM61294 (31)                 | XP_016613015 (44) | XP_005824571 (28) | 0.2214      |
| <i>PraMIPGI;1</i> | PSURA_71778   | -      | PramPr-102_SC0046:367,948..368,772(-) | 274      | ETO69869 (93) <sup>a</sup>       | NP_536354 (42)   | AAM61294 (30)                 | XP_016613015 (51) | XP_005824571 (27) | 0.2148      |
| <i>PraMIPGI;2</i> | PSURA_87677   | -      | PramPr-102_SC2368:1,241..2,140(-)     | 299      | XP_009535734 (93) <sup>b</sup>   | EAW53211 (41)    | NP_180986 (31)                | XP_016613015 (49) | XP_005826794 (25) | 0           |
| <i>PraMIPGI;3</i> | PSURA_72426   | -      | PramPr-102_SC0716:5,808..6,707(-)     | 299      | XP_009535734 (93) <sup>b</sup>   | EAW53211(41)     | NP_180986 (31)                | XP_016613015 (49) | XP_005824571 (25) | 0           |
| <i>PraMIPGI;4</i> | PSURA_71777   | -      | PramPr-102_SC0046:365,813..366,649(-) | 278      | ETI41209 (91) <sup>a</sup>       | CAG46822 (42)    | NP_198597 (31)                | XP_016613015 (46) | XP_005841067 (30) | 0.29        |
| <i>PraMIPGI;5</i> | PSURA_72419   | -      | PramPr-102_SC0660:6,538..7,374(+)     | 278      | KUF89525.1 (91) <sup>d</sup>     | EAW53211(41)     | AAM61294(29)                  | XP_016613015 (48) | XP_005826794 (28) | 0.252       |
| <i>PraMIPGI;6</i> | PSURA_72425   | -      | PramPr-102_SC0716:955..1,704(-)       | 249      | XP_009535728 (92) <sup>b</sup>   | NP_004916 (43)   | NP_192776 (31)                | XP_016613015 (49) | XP_005826794 (28) | 0.4837      |

909 PPL: polypeptide length, aa: amino acid; <sup>a</sup>*P. parasitica*, <sup>b</sup>*P. sojae*, <sup>c</sup>*P. infestans*, <sup>d</sup>*P. nicotianae*; Parenthesis indicates the percentage of identity at the amino acid level

910

911

912

913 **Table 5: MIP genes in *P. capsici* identified from the whole genome shotgun (WGS).**

914

| Gene Name         | Accession No. |         | Genomic location                     | PPL (aa) | Maximum identity with MIP (%) in |                  |                               |                   |                   | Ka/Ks Value |
|-------------------|---------------|---------|--------------------------------------|----------|----------------------------------|------------------|-------------------------------|-------------------|-------------------|-------------|
|                   | Fungi DB      | N C B I |                                      |          | Phytophthora                     | Human taxid 9606 | <i>A. thaliana</i> taxid 3702 | Fungi taxid 4751  | Algae taxid 3027  |             |
| <i>PcaMIPAI;1</i> | PHYCA_530062  | -       | PcapLT1534_SC054:141,263..142,555(-) | 293      | KUF83438 (95) <sup>d</sup>       | CAG46822 (45)    | OAO95087 (32)                 | XP_016613015 (51) | XP_005824571 (32) | 0.288       |
| <i>PcaMIPAI;2</i> | PHYCA_510138  | -       | PcapLT1534_SC054:139,634..140,630(-) | 288      | XP_009535925 (94) <sup>b</sup>   | CAG46822 (44)    | OAO95087 (33)                 | XP_016613015 (51) | XP_005824571 (31) | 0.2203      |
| <i>PcaMIPAI;3</i> | PHYCA_553594  | -       | PcapLT1534_SC054:138,017..138,944(-) | 291      | XP_009535924 (96) <sup>b</sup>   | NP_066190 (43)   | OAO95087 (32)                 | XP_016613015 (51) | XP_005824571 (31) | 0.1602      |
| <i>PcaMIPAI;4</i> | PHYCA_553588  | -       | PcapLT1534_SC054:136,640..137,545(-) | 301      | ETP38902 (90) <sup>a</sup>       | EAW53211 (43)    | NP_178191 (32)                | XP_016613015 (48) | XP_005824571 (30) | 0.4023      |
| <i>PcaMIPCI;1</i> | PHYCA_6911    | -       | PcapLT1534_SC015:427,750..438,233(-) | 280      | XP_008908228 (87) <sup>a</sup>   | EAW53211 (35)    | NP_567572 (30)                | XP_016613015 (39) | XP_005824571 (29) | 0.425       |
| <i>PcaMIPCI;2</i> | PHYCA_123018  | -       | PcapLT1534_SC049:168,741..169,683(+) | 297      | XP_009514460 (90) <sup>b</sup>   | EAW53211 (38)    | NP_198597 (26)                | XP_016613015 (40) | XP_005824571 (26) | 0.2412      |
| <i>PcaMIPCI;3</i> | PHYCA_509760  | -       | PcapLT1534_SC049:192,973..193,950(+) | 299      | XP_002909620 (91) <sup>c</sup>   | EAW53211 (39)    | NP_198597 (27)                | KNE66934 (40)     | XP_005824571 (26) | 0.3848      |
| <i>PcaMIPDI;1</i> | PHYCA_553631  | -       | PcapLT1534_SC054:213,802..214,626(-) | 274      | XP_009535952 (97) <sup>b</sup>   | BAA24864 (42)    | AAF30303 (32)                 | XP_016613015 (50) | XP_005824571 (30) | 0.2115      |
| <i>PcaMIPDI;2</i> | PHYCA_510151  | -       | PcapLT1534_SC054:214,814..215,848(-) | 274      | XP_002903645 (97) <sup>c</sup>   | NP_066190 (42)   | NP_198597 (33)                | KNE66934 (48)     | XP_005824571 (27) | 0.1879      |
| <i>PcaMIPDI;3</i> | PHYCA_124758  | -       | PcapLT1534_SC054:222,559..223,383(+) | 274      | ETK81038 (96) <sup>a</sup>       | BAA24864 (42)    | NP_001330234 (29)             | KNE66934 (47)     | XP_005824571 (27) | 0.2442      |
| <i>PcaMIPEI;1</i> | PHYCA_130684  | -       | PcapLT1534_SC096:30,774..31,649(-)   | 291      | XP_008894431 (95) <sup>a</sup>   | CAG46822 (41)    | OAO95087(31)                  | XP_016613015 (46) | XP_005824571 (27) | 0.2135      |
| <i>PcaMIPEI;2</i> | PHYCA_130620  | -       | PcapLT1534_SC096:32,191..33,045(-)   | 284      | XP_008894432 (92) <sup>a</sup>   | BAA24864 (39)    | NP_174472 (29)                | XP_016613015 (46) | XP_005824571 (28) | 0.2094      |
| <i>PcaMIPFI;1</i> | PHYCA_125677  | -       | PcapLT1534_SC059:215,629..216,567(+) | 312      | ETP11193 (88) <sup>a</sup>       | NP_001161 (38)   | OAP08944 (33)                 | XP_016613015 (41) | XP_005824571 (30) | 0.2323      |
| <i>PcaMIPFI;2</i> | PHYCA_130673  | -       | PcapLT1534_SC096:35,031..35,984(-)   | 317      | XP_008894434 (86) <sup>a</sup>   | BAA24864 (42)    | AAM61294 (29)                 | XP_016613015 (42) | XP_005826812 (31) | 0.2055      |
| <i>PcaMIPGI;1</i> | PHYCA_511729  | -       | PcapLT1534_SC096:27,663..28,733(-)   | 274      | ETO69869 (93) <sup>a</sup>       | EAW53211 (41)    | AAM61294 (32)                 | XP_016613015 (52) | XP_005824571 (28) | 0.188       |
| <i>PcaMIPGI;2</i> | PHYCA_511737  | -       | PcapLT1534_SC096:84,419..89,905(-)   | 300      | XP_009535734 (92) <sup>b</sup>   | EAW53211 (41)    | AAM61294 (31)                 | XP_016613015 (51) | XP_005824571 (25) | 0.2582      |
| <i>PcaMIPGI;3</i> | PHYCA_511725  | -       | PcapLT1534_SC096:15,964..17,034(-)   | 304      | ETI41209 (87) <sup>a</sup>       | NP_004916 (39)   | CAA68906 (29)                 | XP_016613015 (44) | XP_005841067 (32) | 0.1959      |
| <i>PcaMIPGI;4</i> | PHYCA_512201  | -       | PcapLT1534_SC669:271..1,219(+)       | 297      | XP_009535 27 (80) <sup>b</sup>   | EAW53211 (38)    | AAM61294 (29)                 | CDO57616 (46)     | XP_005826794 (28) | 0.2401      |
| <i>PcaMIPGI;5</i> | PHYCA_130634  | -       | PcapLT1534_SC096:96,478..97,393(+)   | 268      | XP_009535727 (85) <sup>b</sup>   | EAW53211 (38)    | NP_192776 (27)                | XP_016613015 (42) | XP_005826794 (27) | 0.6911      |

915 PPL: polypeptide length, aa: amino acid; <sup>a</sup>*P. parasitica*, <sup>b</sup>*P. sojae*, <sup>c</sup>*P. infestans*, <sup>d</sup>*P. nicotianae*; parenthesis indicates the percentage of identity at the amino acid level

916

917

918

919

920

921

922

923

924

925

926

927

928 **Table 6: MIP genes in *P. cinnamomi* identified from the whole genome shotgun (WGS).**  
 929

| Gene Name         | Accession No. |         | Genomic location                         | PPL (aa) | Maximum identity with MIP (%) in |                  |                               |                   |                   | Ka/Ks Value |
|-------------------|---------------|---------|------------------------------------------|----------|----------------------------------|------------------|-------------------------------|-------------------|-------------------|-------------|
|                   | Fungi DB      | N C B I |                                          |          | Phytophthora                     | Human taxid 9606 | <i>A. thaliana</i> taxid 3702 | Fungi taxid 4751  | Algae taxid 3027  |             |
| <i>PciMIPAI;1</i> | PHYCI_94066   | -       | PcinCBS144-22_SC0062:223,255..224,286(+) | 294      | XP_009535926 (94) <sup>a</sup>   | CAG46822 (45)    | NP_198598(30)                 | XP_016613015 (52) | XP_005824571 (29) | 0.3049      |
| <i>PciMIPAI;2</i> | PHYCI_94067   | -       | PcinCBS144-22_SC0062:224,851..225,867(+) | 293      | XP_009535925 (91) <sup>a</sup>   | BAA24864 (44)    | OAO95087 (32)                 | XP_016613015 (51) | XP_005824571 (30) | 0.1199      |
| <i>PciMIPAI;3</i> | PHYCI_229810  | -       | PcinCBS144-22_SC0062:226,809..227,681(+) | 290      | ETI40982 (97) <sup>c</sup>       | CAG46822 (47)    | NP_198598 (31)                | XP_016613015 (52) | XP_005824571 (30) | 0.1787      |
| <i>PciMIPAI;4</i> | PHYCI_9455    | -       | PcinCBS144-22_SC0062:220,189..222,911(+) | 381      | XP_009535927 (76) <sup>a</sup>   | NP_004916 (39)   | OAO95087 (28)                 | XP_016613015 (44) | XP_005824571 (28) | 0.3056      |
| <i>PciMIPAI;5</i> | PHYCI_313549  | -       | PcinCBS144-22_SC0062:228,193..229,286(+) | 301      | XP_009535923 (89) <sup>a</sup>   | BAA2486 (45)     | OAO95087 (31)                 | XP_016613015 (49) | XP_005824571 (30) | 0.3364      |
| <i>PciMIPBI;1</i> | PHYCI_229797  | -       | PcinCBS144-22_SC0062:231,204..232,106(-) | 300      | XP_009535922 (91) <sup>a</sup>   | NP_066190 (37)   | NP_198597 (29)                | XP_016613015 (46) | XP_005826812 (29) | 0.8309      |
| <i>PciMIPCI;1</i> | PHYCI_93687   | -       | PcinCBS144-22_SC0055:271,156..272,257(-) | 298      | XP_009529571 (96) <sup>a</sup>   | EAW53211 (39)    | NP_567572 (29)                | XP_016613015 (39) | XP_005824571 (26) | 0.331       |
| <i>PciMIPCI;2</i> | PHYCI_91871   | -       | PcinCBS144-22_SC0024:340,304..341,393(-) | 302      | XP_009514460 (95) <sup>a</sup>   | NP_004916 (41)   | NP_198597 (25)                | ESA22038(40)      | XP_005824571 (26) | 0.1932      |
| <i>PciMIPCI;3</i> | PHYCI_91869   | -       | PcinCBS144-22_SC0024:333,891..335,020(+) | 299      | XP_009514453 (97) <sup>a</sup>   | EAW53211 (38)    | NP_198597 (26)                | KNE66934 (39)     | XP_005824571 (24) | 0.486       |
| <i>PciMIPDI;1</i> | PHYCI_313498  | -       | PcinCBS144-22_SC0062:137,089..138,034(+) | 274      | XP_009535952 (99) <sup>a</sup>   | BAA24864 (43)    | AAF30303 (32)                 | XP_016613015 (50) | XP_005824571 (30) | 0.2961      |
| <i>PciMIPDI;2</i> | PHYCI_94042   | -       | PcinCBS144-22_SC0062:135,806..136,774(+) | 275      | XP_002903645 (97) <sup>b</sup>   | NP_066190 (41)   | OAO95087 (33)                 | KNE66934 (48)     | XP_005824571 (26) | 0.2372      |
| <i>PciMIPDI;3</i> | PHYCI_9427    | -       | PcinCBS144-22_SC0062:133,313..134,252(-) | 289      | XP_009535954 (97) <sup>a</sup>   | NP_066190 (41)   | NP_198598 (30)                | KNE66934 (47)     | XP_005824571 (26) | 0.1816      |
| <i>PciMIPEI;1</i> | PHYCI_254750  | -       | PcinCBS144-22_SC0271:71,261..72,250(+)   | 329      | XP_009535744 (88) <sup>a</sup>   | EAW53211 (40)    | NP_198597 (32)                | XP_016613015 (44) | XP_005824571(27)  | 0.2887      |
| <i>PciMIPEI;2</i> | PHYCI_254766  | -       | PcinCBS144-22_SC0271:69,814..70,674(+)   | 265      | XP_002903502 (88) <sup>b</sup>   | BAA24864 (38)    | NP_174472 (31)                | XP_016613015 (43) | XP_005824571 (29) | 0.194       |
| <i>PciMIPF1;1</i> | PHYCI_92025   | -       | PcinCBS144-22_SC0027:233,171..234,286(-) | 314      | ETP11188.1 (83) <sup>c</sup>     | BAA24864 (38)    | OAP08944(32)                  | XP_016613015 (46) | XP_005824571 (27) | 0.243       |
| <i>PciMIPF1;2</i> | PHYCI_437341  | -       | PcinCBS144-22_SC0271:58,255..59,614(-)   | 311      | ETP11188 (79) <sup>c</sup>       | NP_066190 (39)   | AAM61294 (32)                 | XP_016613015 (46) | XP_005824571 (25) | 0.2497      |
| <i>PciMIPF1;3</i> | PHYCI_328142  | -       | PcinCBS144-22_SC0271:66,502..67,452(+)   | 316      | XP_009535748 (88) <sup>a</sup>   | BAA24864 (40)    | AAM61294 (30)                 | XP_016613015 (41) | XP_005824571 (26) | 0.3537      |
| <i>PciMIPGI;1</i> | PHYCI_98973   | -       | PcinCBS144-22_SC0271:77,191..78,471(+)   | 360      | ETI41209 (84) <sup>c</sup>       | NP_004916 (39)   | NP_198597 (29)                | XP_016613015 (43) | XP_005841067 (30) | 0.2493      |
| <i>PciMIPGI;2</i> | PHYCI_319932  | -       | PcinCBS144-22_SC0114:181,147..182,144(+) | 302      | XP_009535727 (88) <sup>a</sup>   | NP_004916 (43)   | AAM61294 (30)                 | XP_016613015 (45) | XP_005824571 (25) | 0.211       |
| <i>PciMIPGI;3</i> | PHYCI_319929  | -       | PcinCBS144-22_SC0114:178,016..179,052(-) | 314      | XP_008894426 (86) <sup>c</sup>   | EAW53211 (39)    | NP_192776 (29)                | XP_016613015 (44) | XP_005826794 (28) | 0.1665      |
| <i>PciMIPH1;1</i> | PHYCI_254774  | -       | PcinCBS144-22_SC0271:47,972..49,023(-)   | 281      | XP_009535754 (81) <sup>a</sup>   | BAA24864 (32)    | AAM61294 (29)                 | KJX95442 (33)     | XP_005824571 (28) | 0.2739      |
| <i>PciMIPH1;2</i> | PHYCI_34767   | -       | PcinCBS144-22_SC0271:68,054..69,058(+)   | 321      | XP_008894433 (82) <sup>b</sup>   | BAA24864 (38)    | NP_566271 (28)                | XP_013271045(38)  | XP_005825107 (33) | 0.4769      |

930 PPL: polypeptide length, aa: amino acid; <sup>a</sup>*P. sojae*, <sup>b</sup>*P. infestans*, <sup>c</sup>*P. parasitica*; parenthesis indicates the percentage of identity at the amino acid level

932

933 **Table 7:** PMIP group-specific consensus sequences/motif in the corresponding regions in different TM helices and loops.

934

| PMIPs Group        | N-termini | LA                | LB*                            | LC                                | LD                  | LE                                 | TM3                       | TM4                                              | TM5                                   | C-termini |
|--------------------|-----------|-------------------|--------------------------------|-----------------------------------|---------------------|------------------------------------|---------------------------|--------------------------------------------------|---------------------------------------|-----------|
| MIPAs              | -         | QV(V/T)LS         | GIH(V/A)(S/C)<br>GGVS          | P(M/L)(F/I)x(H/V/T)<br>(I/T/V)D   | GDE(L/M)NKP         | GMN(T/S)G(Y/F)AI<br>AGWGS(R/E)     | Y(I/V)(I/V)<br>(A/S)Q     | (V/I/T)GTCF(L/M)TE<br>LL(L/M/V)(G/C)(G/C)(I/L)FA | P(G/S)AVALLVVAIGM                     | E(H/Q)HH  |
| MIPBs              | -         | QSILS             | GIHI(A/G)<br>GGVS              | PLLN(V/A/V)D                      | LDQHNRP             | SVNTGCAI<br>AGWGSH                 | YVAAQ                     | NF(I/V)AFLTE<br>LVGGIFA                          | PSAVALLVVGIGM                         | GHHH      |
| MIPCs              | -         | QV(T/V)LS         | GI(T/S)(V/I)<br>(G/V)GGVS      | P(M/L)(E/L)N<br>(E/I)VD           | (L/Q)DQHNRP         | (G/A)MNTGLAI<br>(A/V)GWGS(R/H)     | Y(I/L)L(V/N)Q             | NFTCFLTE<br>L(V/I)(V/L)G(I/F)LA                  | P(P/A)A(I/V)G(V/A)LVS<br>(A/T)IAM     | GYHH      |
| MIPDs <sup>a</sup> | Short     | QFVLS             | G(V/I)HF(S/A)<br>GGVS          | PW(F/L)D(I/L/V)<br>(V/H/Q)D       | (G/C)DQ(L/I)NKP     | GL(D/N)TGYAL<br>(A/G)GWGWK         | Y(F/I)(V/I)AQ             | NW <sub>x</sub> (A/G)(L/F)ANE<br>LV(S/G)GIFA     | P(G/A)AV(A/G)L(M/L)LT<br>(C/G)(I/V)GM | Ex(H/F)H  |
| MIPEs <sup>b</sup> | Long      | QVNLS             | GVYVAEGIS                      | Q(R/N)(L/I)M<br>(D/E)ED           | TDERNRG             | GMNTGYAL<br>AG(F/Y)GPK             | YAxAQ                     | NLTAFYSE<br>LL(M/I/L)AIYA                        | PFAF(A/S)(L/M)LFMGLGM                 | Q(L/T)QH  |
| MIPFs              | -         | QVxLS             | GVYCSEGVs                      | Q(K/R)(I/L)xKxD                   | TDQ(N/R)NRS         | GMNTGYAM<br>AGYGSK(W/F)            | Y(W/C/V)<br>(L/V/A)(S/A)Q | NxTAFYTE<br>LLC(I/V)YA                           | PFAFALMIMALGM                         | QxQH      |
| MIPGs              | Long      | QVTNS             | GVYCSEGIS                      | QNLNV(I/V)D                       | TD(K/Q/T)RNR(P/S/A) | GMNTGYA(V/I)<br>AGWGSK             | YMxSQ                     | NYTAFYTE<br>L(V/L)L(G/S/A)(I/V)YA                | (P/A)FAF(C/A)L(M/L)I(M/W)<br>ALGM     | E(I/M)HH  |
| MIPHs              |           | QVA(L/I)<br>(S/W) | G(T/V)x(V/T)x<br>(V/T)A(D/E)VS | (Q/E)((K/N)I(R/S)<br>(R/A) (E/G)D | KD(K/R)RNRW         | SLNTGLGx<br>(A/I)GY(H/K)-<br>(M/E) | YMxAQ                     | NYTAFYTE<br>(I/L)MLASYA                          | PFALALLVTAIS                          | ExQH      |
| MIPi               | -         |                   | ATFIASPGS                      |                                   | R-QPVQP             | TPFTQACL                           | YMLFQ                     | AGGAFFLE<br>FVLVHRV                              | PLYIGSALAALTM                         |           |

935

936 <sup>a</sup>PMIP group containing MIPs of short C-termini.937 <sup>b</sup>PMIP group containing MIPs of D and E-enrich C-termini

938 \*Sequence shares TM2 and LB

939 LE, the first sequence is from the upstream of NPA motif and the second sequence is from five residues downstream of the P3.

940 LC motif starts one residue downstream of P1

941 TM4, the first sequence starts the TM4 and the second sequence is just before the last residue the TM4.

942 C-termini, adjacent to the TM6

943

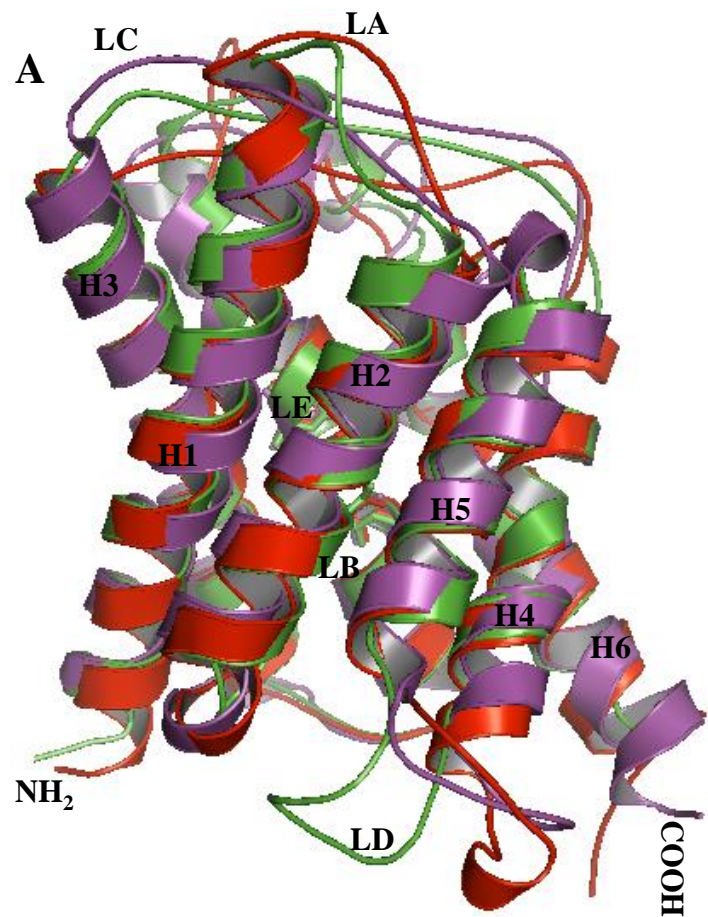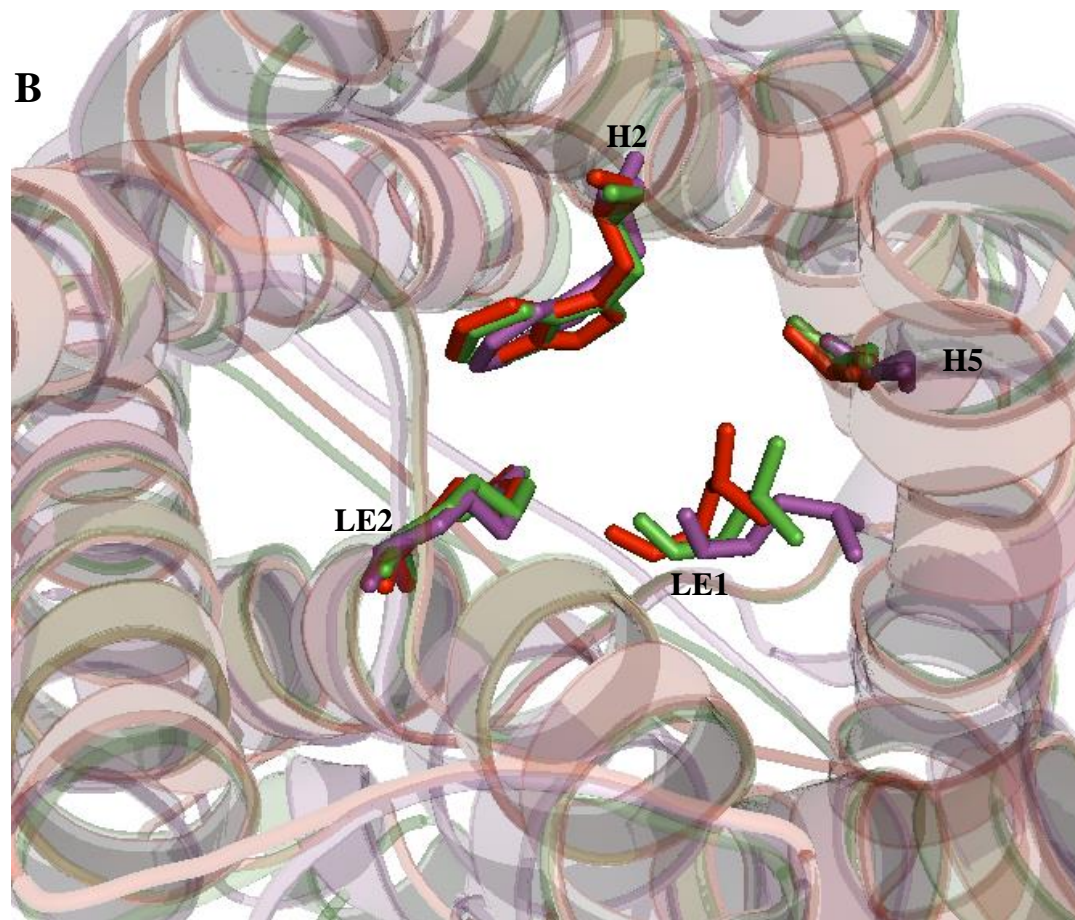

**Figure 1**



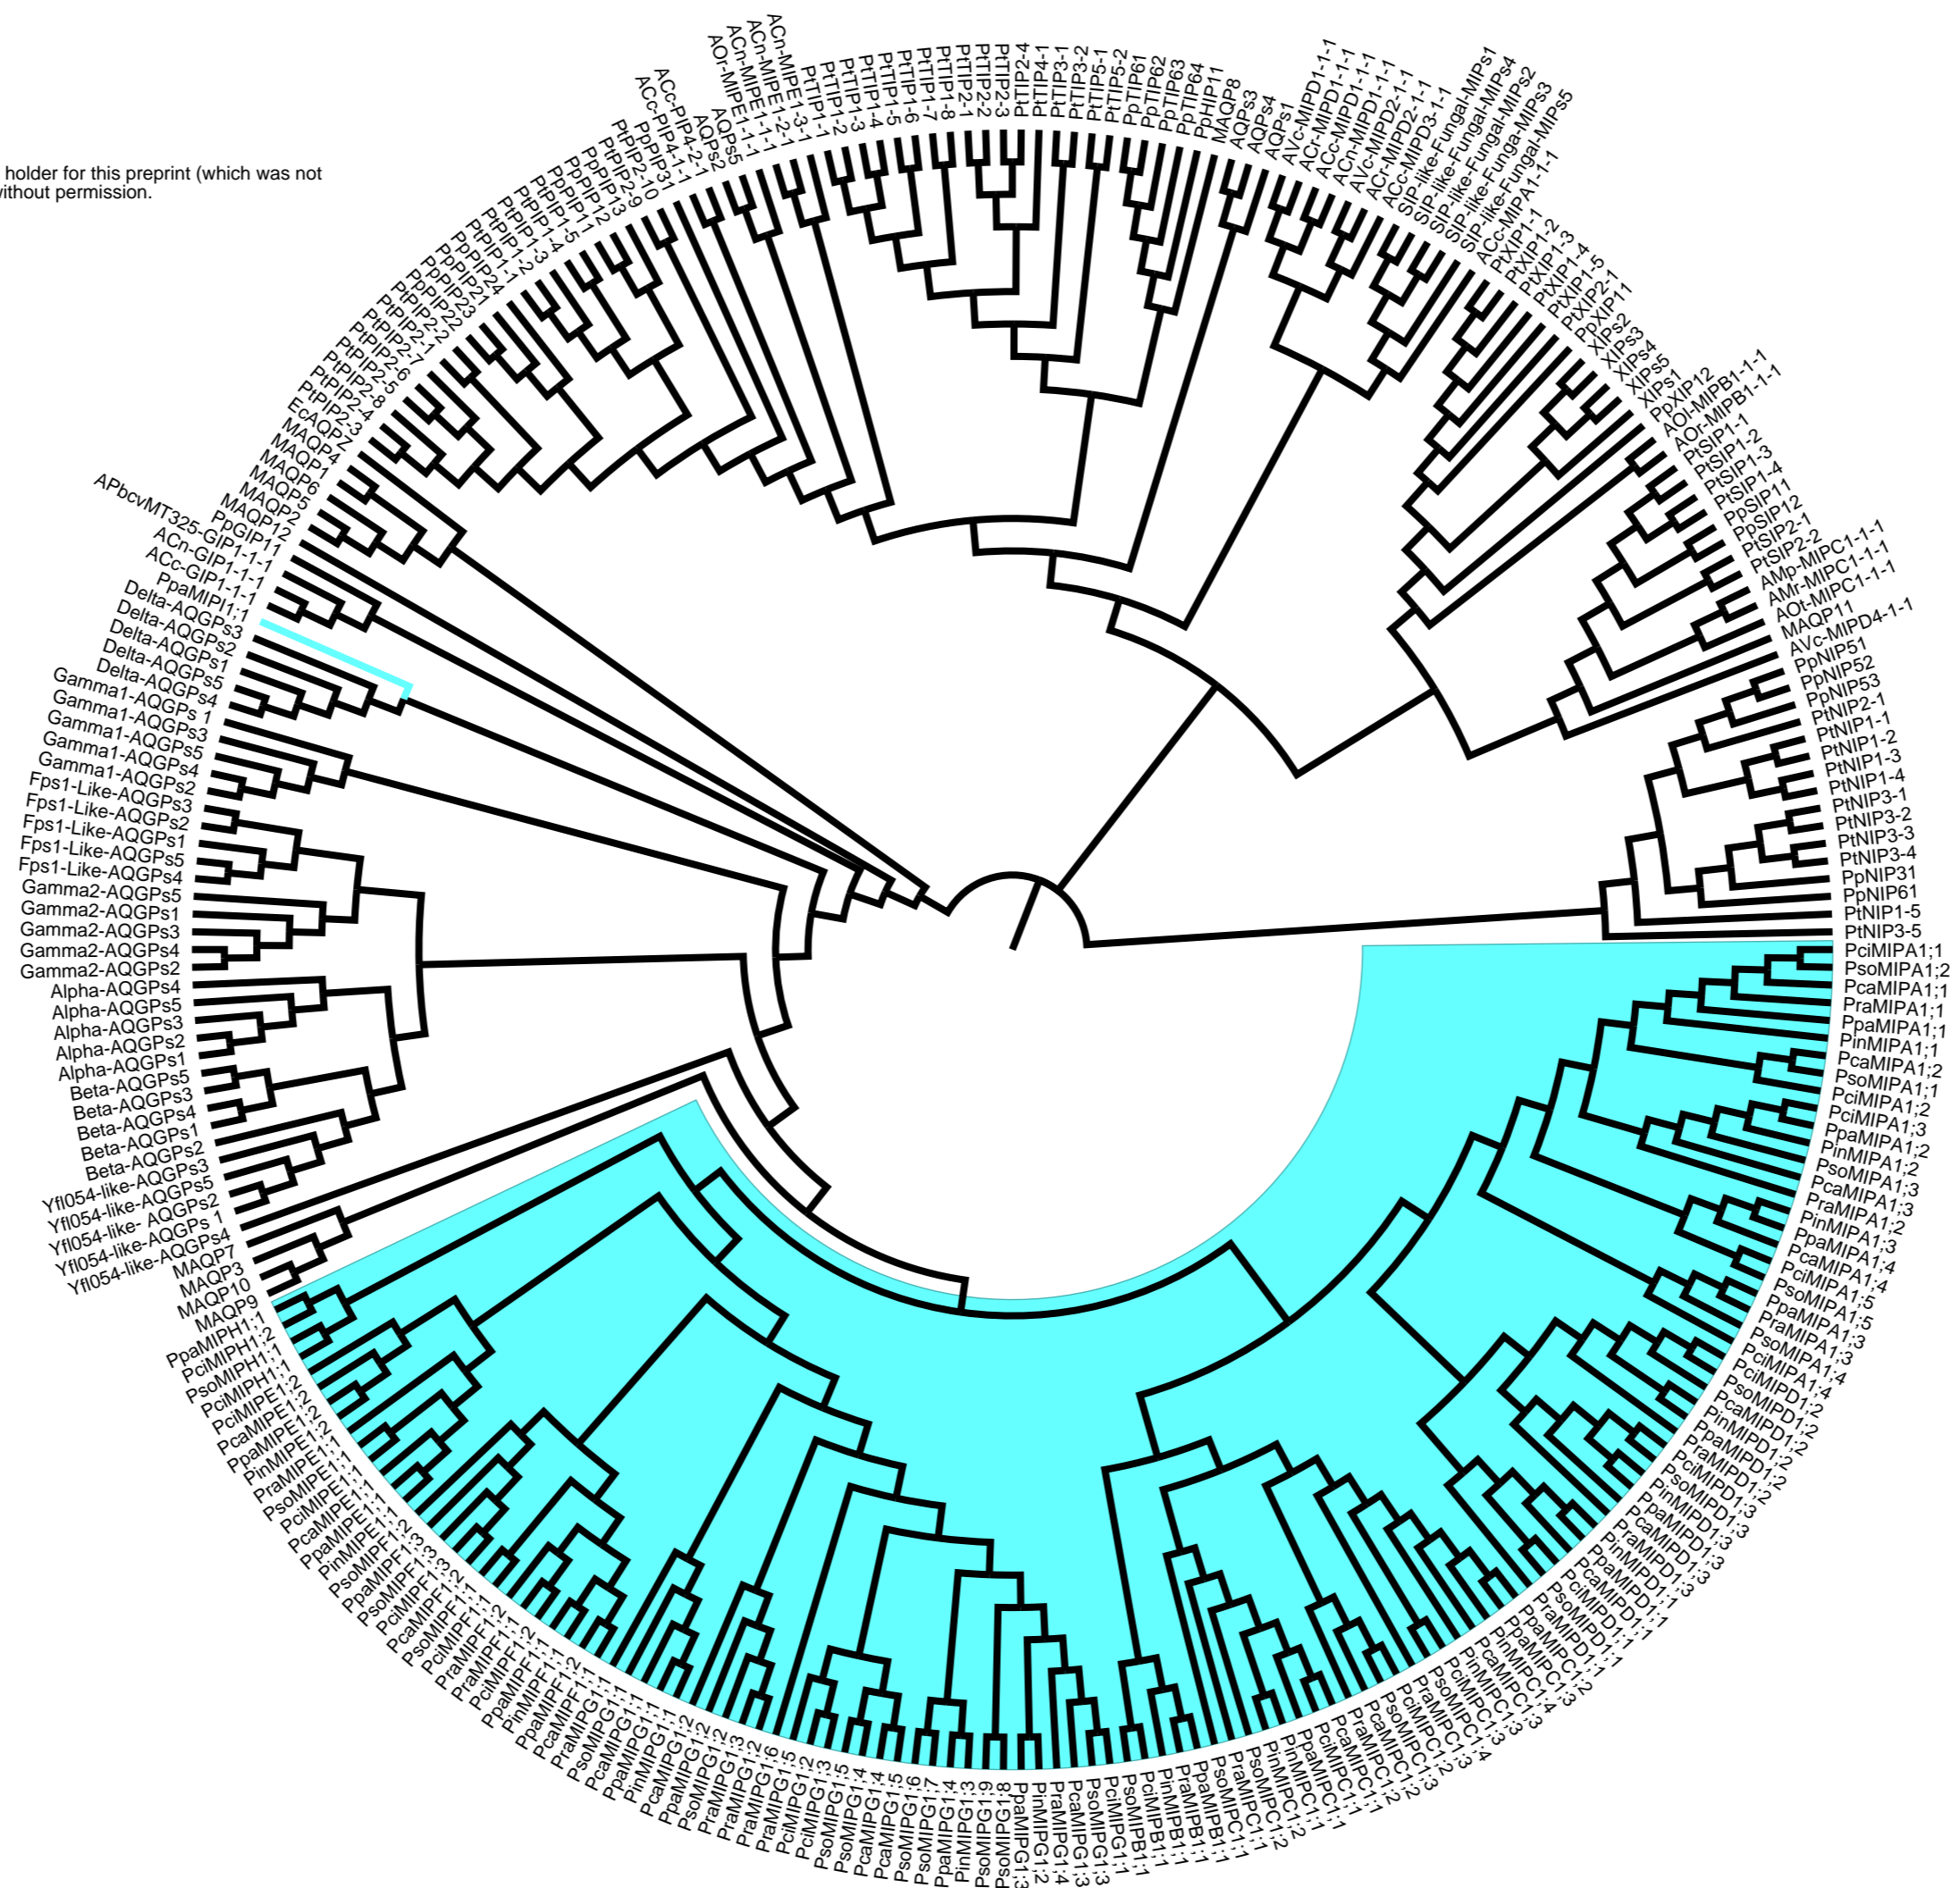

Figure 2

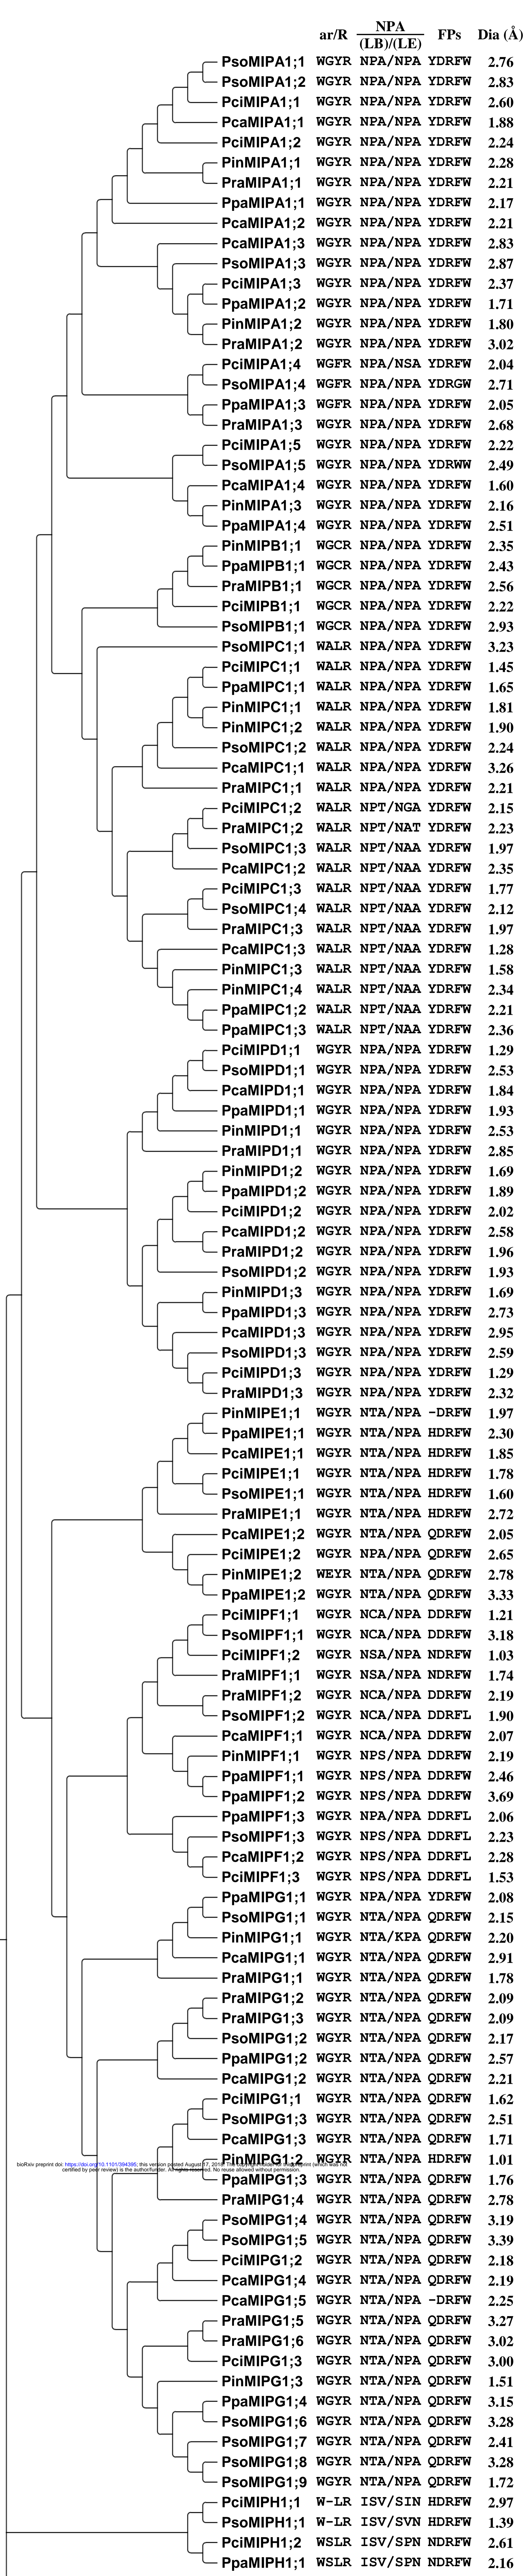

Figure 3

| Intron Number      | Gene name                     | General schematic structure of <i>Phytophthora</i> MIP genes with introns' position |  |
|--------------------|-------------------------------|-------------------------------------------------------------------------------------|--|
| No intron (107)    | <i>PMIPs</i>                  |                                                                                     |  |
| Single Intron (13) | <i>PcaMIPC1;1</i>             |                                                                                     |  |
|                    | <i>PcaMIPC1;2, PcaMIPG1;5</i> |                                                                                     |  |
|                    | <i>PcaMIPG1;2, PciMIPD1;3</i> |                                                                                     |  |
|                    | <i>PcaMIPG1;4</i>             |                                                                                     |  |
|                    | <i>PciMIPE1;2</i>             |                                                                                     |  |
|                    | <i>PinMIPE1;2</i>             |                                                                                     |  |
|                    | <i>PinMIPA1;1</i>             |                                                                                     |  |
|                    | <i>PpaMIPA1;1</i>             |                                                                                     |  |
|                    | <i>PsoMIPE1;1</i>             |                                                                                     |  |
|                    | <i>PsoMIPF1;3</i>             |                                                                                     |  |
|                    | <i>PsoMIPF1;2</i>             |                                                                                     |  |
|                    | Two Introns (4)               | <i>PciMIPH1;1</i>                                                                   |  |
|                    |                               | <i>PinMIPG1;2</i>                                                                   |  |
| <i>PinMIPE1;1</i>  |                               |                                                                                     |  |
| <i>PsoMIPH1;1</i>  |                               |                                                                                     |  |
| Three Introns (1)  | <i>PciMIPA1;4</i>             |                                                                                     |  |
| Five Introns (1)   | <i>PinMIPC1;3</i>             |                                                                                     |  |

**Figure 4**

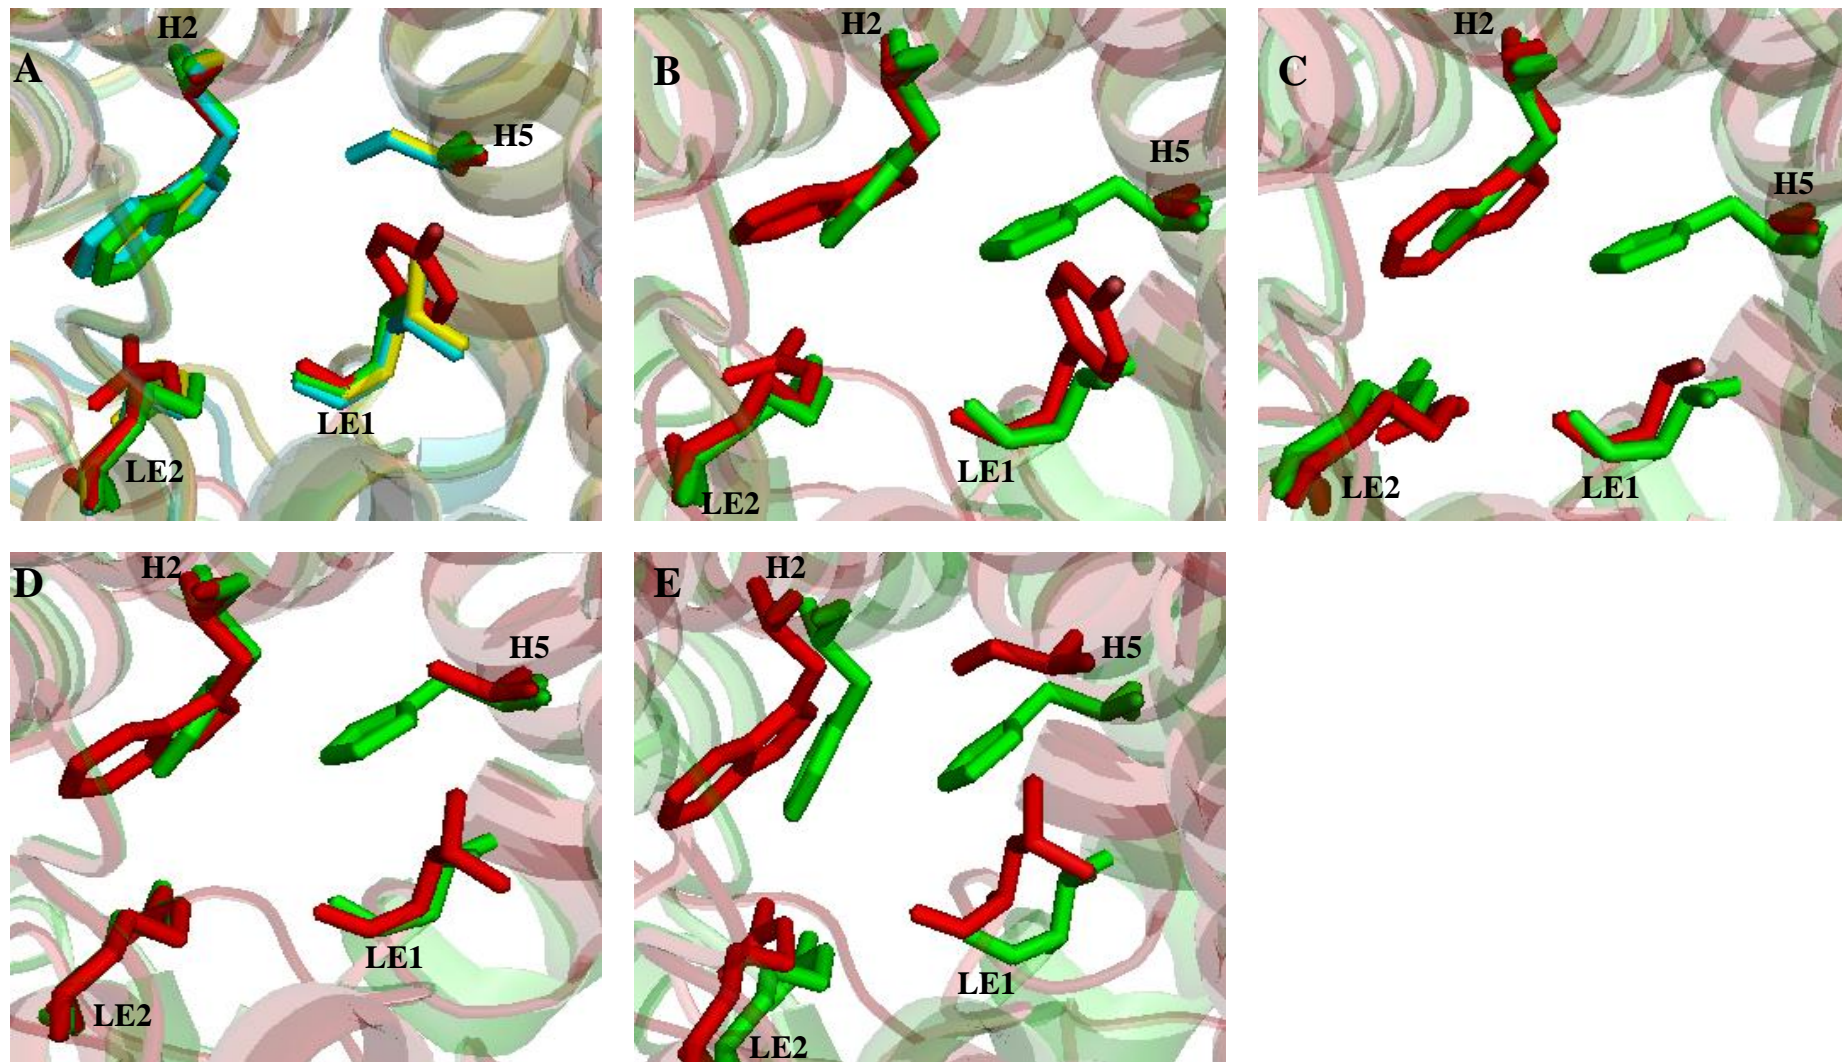

Figure 5
